1 **The impact of social and environmental extremes on cholera time varying reproduction**  
2 **number in Nigeria**

3  
4 **Gina E C Charnley<sup>1,2</sup>, Sebastian Yennan<sup>3</sup>, Chinwe Ochu<sup>3</sup>, Ilan Kelman<sup>4,5,6</sup>, Katy A M**  
5 **Gaythorpe<sup>1,2</sup>, Kris A Murray<sup>1,2,7</sup>**

6  
7 *1. Department of Infectious Disease Epidemiology, School of Public Health, Imperial College*  
8 *London, London, UK*

9 *2. MRC Centre for Global Infectious Disease Analysis, School of Public Health, Imperial College*  
10 *London, London, UK*

11 *3. Surveillance and Epidemiology Department/IM Cholera, Nigeria Centre for Disease Control,*  
12 *Abuja, Nigeria*

13 *4. Institute for Risk and Disaster Reduction, University College London, London, UK*

14 *5. Institute for Global Health, University College London, London, UK*

15 *6. University of Agder, Kristiansand, Norway*

16 *7. MRC Unit The Gambia at London School of Hygiene and Tropical Medicine, Fajara, The*  
17 *Gambia*

18  
19 Correspondence to: Gina E C Charnley, [g.charnley19@imperial.ac.uk](mailto:g.charnley19@imperial.ac.uk)

20 <https://orcid.org/0000-0003-2087-7822>

21  
22 **Abstract**

23 Nigeria currently reports the second highest number of cholera cases in Africa, with numerous  
24 socioeconomic and environmental risk factors. Less investigated are the role of extreme events,  
25 despite recent work showing their potential importance. To address this gap, we estimated time  
26 varying reproductive number (R) from cholera incidence in Nigeria and used a machine learning  
27 approach to evaluate its association with extreme events (conflict, flood, drought) and pre-existing  
28 vulnerabilities (poverty, sanitation, healthcare). We then created a traffic-light system for cholera

NOTE: This preprint reports new research that has not been certified by peer review and should not be used to guide clinical practice.

29 outbreak risk, using three hypothetical traffic-light scenarios (Red, Amber and Green) and used this  
30 to predict R. The system highlighted potential extreme events and socioeconomic thresholds for  
31 outbreaks to occur. We found that reducing poverty and increasing access to sanitation lessened  
32 vulnerability to increased cholera risk caused by extreme events (monthly conflicts and the  
33 Palmers Drought Severity Index). The work presented here shows the need for sustainable  
34 development for disaster prevention and mitigation and to improve health and quality of life.

35

## 36 **Introduction**

37 Cholera was reintroduced into Africa in the 1970s during the seventh and continuing cholera  
38 pandemic. It has since caused significant mortality and morbidity, especially amongst the most  
39 vulnerable, such as children under five<sup>1</sup>. Despite this, other disease outbreaks have drawn  
40 attention away from cholera in Africa in recent years, including COVID-19 and Ebola<sup>2,3</sup>. Explosive  
41 cholera outbreaks are not uncommon due to the short incubation period (2 hours to 5 days) and  
42 high numbers of asymptomatic infections, which when contaminating the environment can sustain  
43 transmission<sup>4</sup>. Cholera is considered a disease of inequity and is preventable through wide-spread  
44 access to safe drinking water and sanitation<sup>5</sup>. However, the effect of these pre-existing  
45 vulnerabilities on disease risk can be exacerbated in times of environmental and social extremes,  
46 which can in turn act as a catalyst for, or exacerbate the impacts of, outbreaks.

47

48 Previous research has found several links between extreme events and cholera including floods,  
49 drought and conflict<sup>6-8</sup>. Disaster-related risk factors leading to disease outbreaks include an  
50 inability to access routine care such as vaccination, fears over safety, destruction of infrastructure,  
51 disruption of water, sanitation and hygiene (WASH) services and human displacement<sup>9,10</sup>. Previous  
52 research on disaster-related infectious disease outbreaks have examined extreme events in  
53 isolation<sup>7,10</sup>, while others do not include multiple pre-existing socio-economic factors into the  
54 methodology<sup>11,12</sup>. Research linking several social and environmental extremes to diseases,  
55 including via risk factor cascades, is a global research gap and is important for predicting cholera  
56 transmission and mitigating outbreaks<sup>13</sup>.

57

58 Nigeria currently reports the second highest number of estimated cholera cases in Africa<sup>1,14</sup> and  
59 has experienced many large outbreaks<sup>15-18</sup>. This is likely due to the presence of many underlying  
60 social and environmental risk factors, including a favourable climate<sup>19,20</sup>, poor access to WASH<sup>21,22</sup>  
61 and a high proportion of the population living in poverty (62% at <\$1.25/day)<sup>23-25</sup>. It also has a  
62 relatively robust reporting system which may correlate with more cases, as cholera is an under-  
63 reported disease and cases and deaths are often missed or misattributed. The country has been  
64 frequently challenged by both social and environmental extremes such as drought and floods,  
65 which may alter in intensity and frequency with climate change<sup>13,24</sup>, along with ongoing conflict in  
66 the northeastern region due to Boko Haram (Islamic State West Africa Province)<sup>8,13</sup>.

67

68 Here, we aim to resolve the role of extreme events in causing or contributing to cholera and  
69 increase the attention on cholera in Nigeria. In collaboration with the Nigeria Centre for Disease  
70 Control (NCDC), we evaluated by way of machine learning how a range of environmental and  
71 social covariates influence time-varying reproductive number ( $R$ ) of cholera. Using the model with  
72 the best predictive power, we predicted a traffic-light system of cholera risk to illustrate how  
73 disasters and pre-existing vulnerabilities alter  $R$  and therefore the risk of cholera outbreaks. We  
74 anticipate that this novel and relatively simple framework of cholera outbreak risks could be  
75 employed by a range of professionals working in fragile settings by targeting interventions towards  
76 key disaster-related risk factors.

77

## 78 **Results**

### 79 *Incidence and $R$*

80 In Nigeria, there were 837 and 564 confirmed cholera cases for 2018 and 2019, respectively. The  
81 geographic distribution of confirmed cases is shown in Fig. 1a and are concentrated in the northeast  
82 of the country, with Adamawa, Borno, Katsina and Yobe having the highest burden. The number of  
83 cases declined steeply with age to a minimum in the 35-44 years category, before increasing again

84 over 45 years. Whereas, cases were relatively evenly split by sex overall, with slightly more males  
85 affected in 2018 (51.6% male) and more females in 2019 (43.6% male) (Fig. 1b).  
86

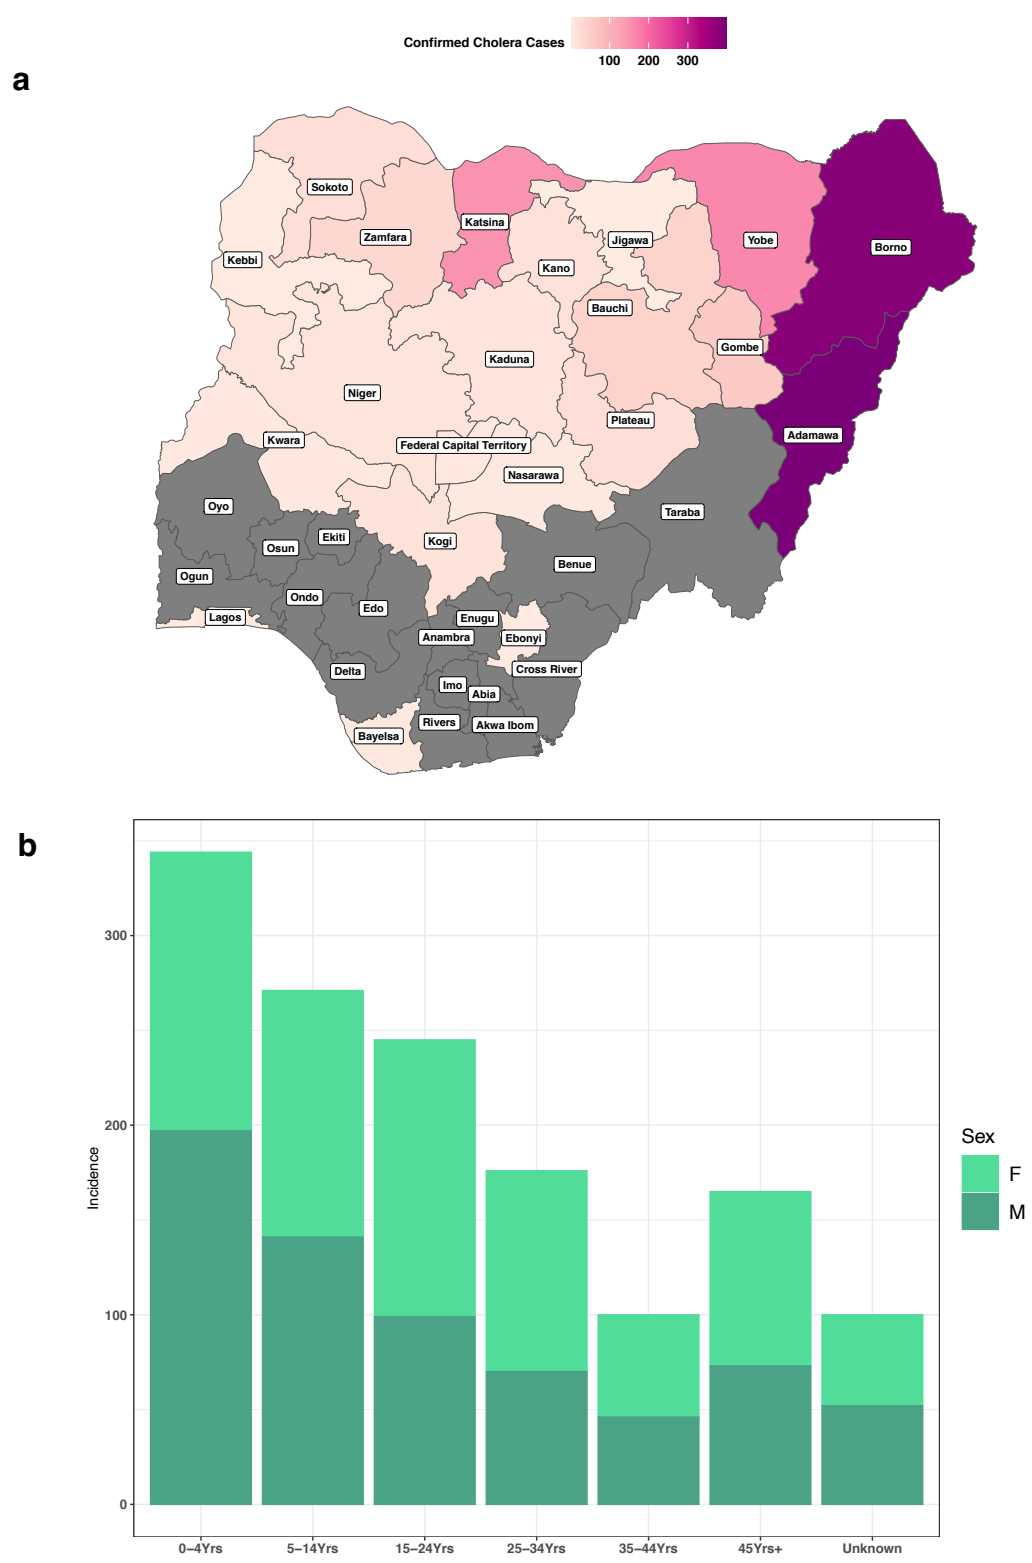

**Fig. 1: Number of confirmed cholera cases. a**, by state, grey indicates states that had no reported confirmed cases and **b**, by sex and age group, all for 2018 and 2019.

87 Six states for 2018 and two states for 2019 had sufficient cases to be included for R calculations,  
88 including Adamawa (2018 & 2019), Bauchi (2018), Borno (2018 & 2019), Gombe (2018), Katsina  
89 (2018) and Yobe (2018). Both the R values and the incidence data used to calculate R are shown  
90 temporally in Fig. 2 for each state and year. Some states appear to have a peak in transmission  
91 around June-July, whereas others appear later during September to October.

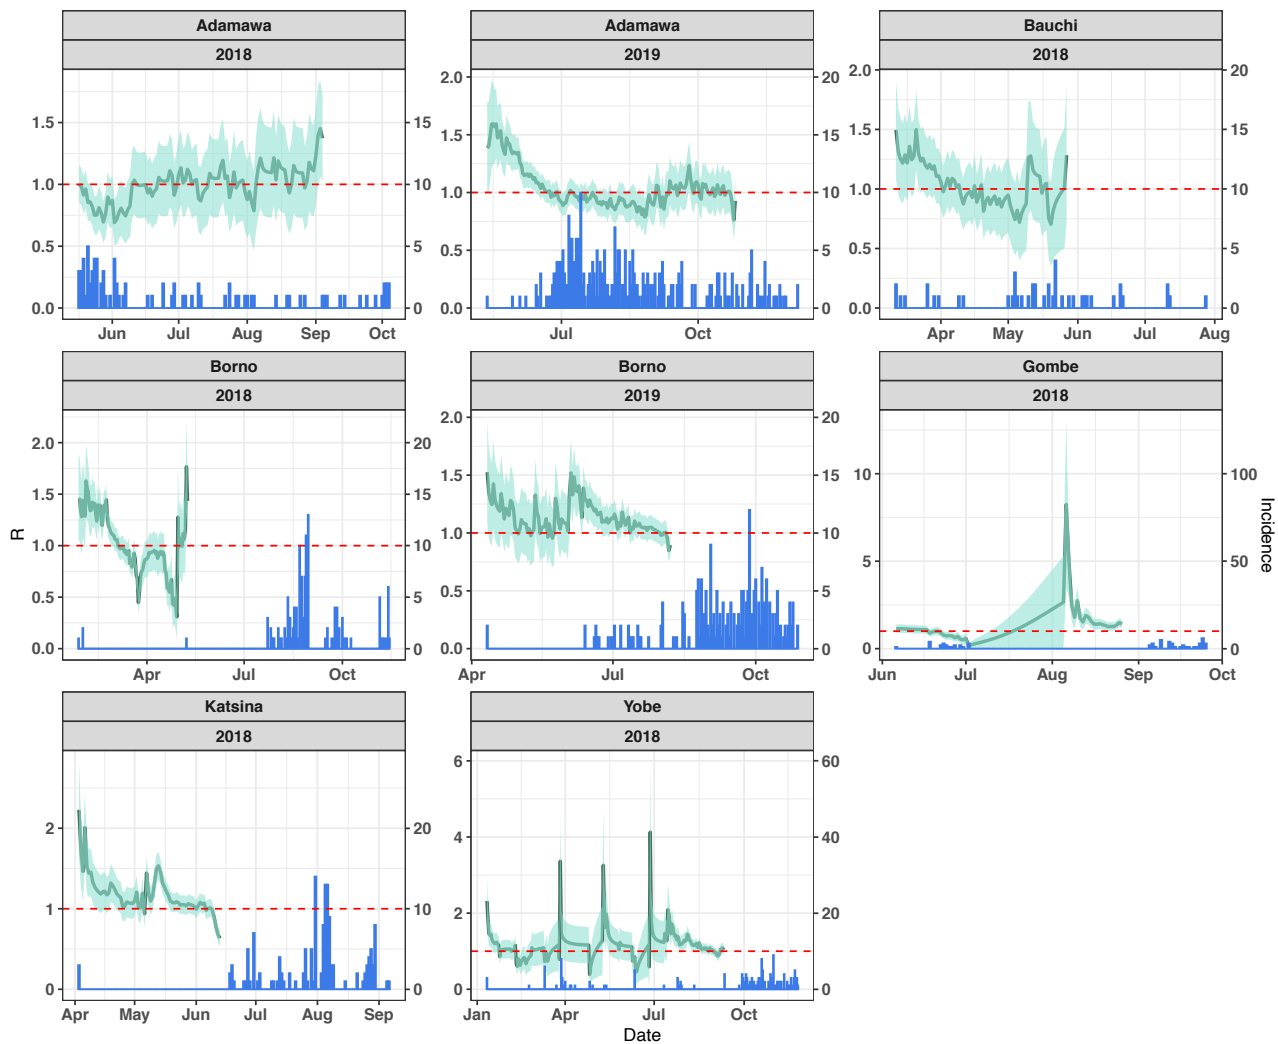

**Fig. 2: R values (line) calculated from the incidence (bar) of cholera.** Data is for the confirmed cholera cases for 2018 and 2019 of states which met the threshold equal to or more than 40 cases.

92

### 93 *Covariate Selection and Random Forest Models*

94 Twenty-one covariates were included in the clustering and variable importance analyses and were  
95 grouped into nine clusters. The clusters and variable importance (based on reducing node impurity)

96 of each covariate are shown in Fig. 3. Stepping through different covariate combinations, the best  
 97 fit model included number of monthly conflict events, Multidimensional Poverty Index (MPI),  
 98 Palmers Drought Severity Index (PDSI) and improved access to sanitation, fitted to R values with a  
 99 serial interval of 5 days (standard deviation: 8 days). The fit of the incidence-based vs covariate-  
 100 based R values (including error) are shown in Fig. 4 and had a correlation of 0.87, with the model  
 101 RMSE at 0.33 and  $R^2$  of 0.32.  
 102

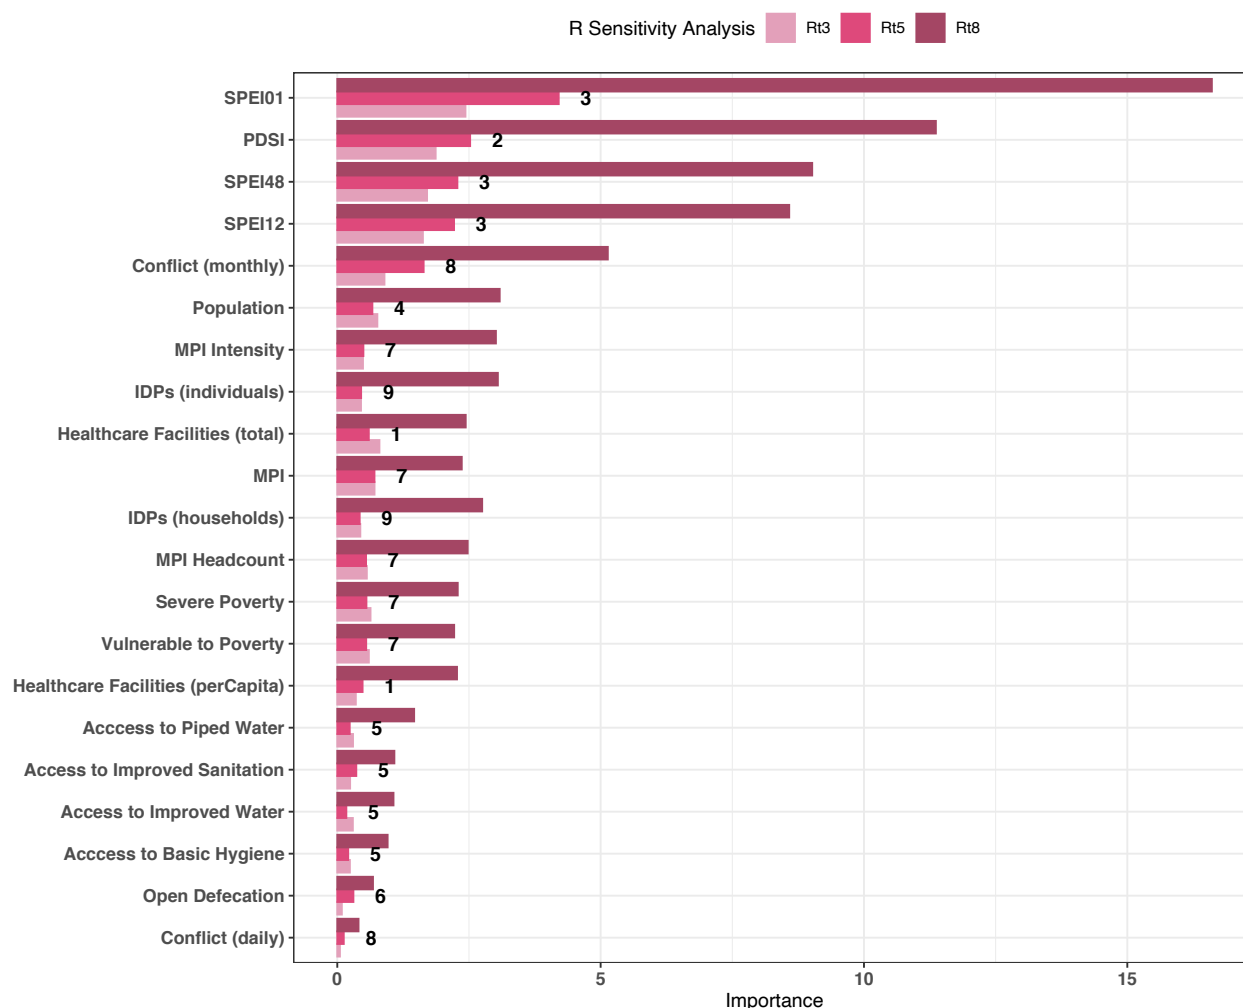

**Fig. 3: The variable importance for the 21 tested for inclusion in the best fit model.** All three serial interval values tested are shown (Rt3 - 3 days, Rt5 - 5 days, Rt8 - 8 days) and the numbers represent the clusters. Variable importance is measured through node impurity (see Methods for details). SPEI01, 12, 48 - Standardised Precipitation Index calculated on 1, 12 and 48 month scale. PDSI - Palmers Drought Severity Index. MPI - Multidimensional Poverty Index. IDP – Internally Displaced Persons.

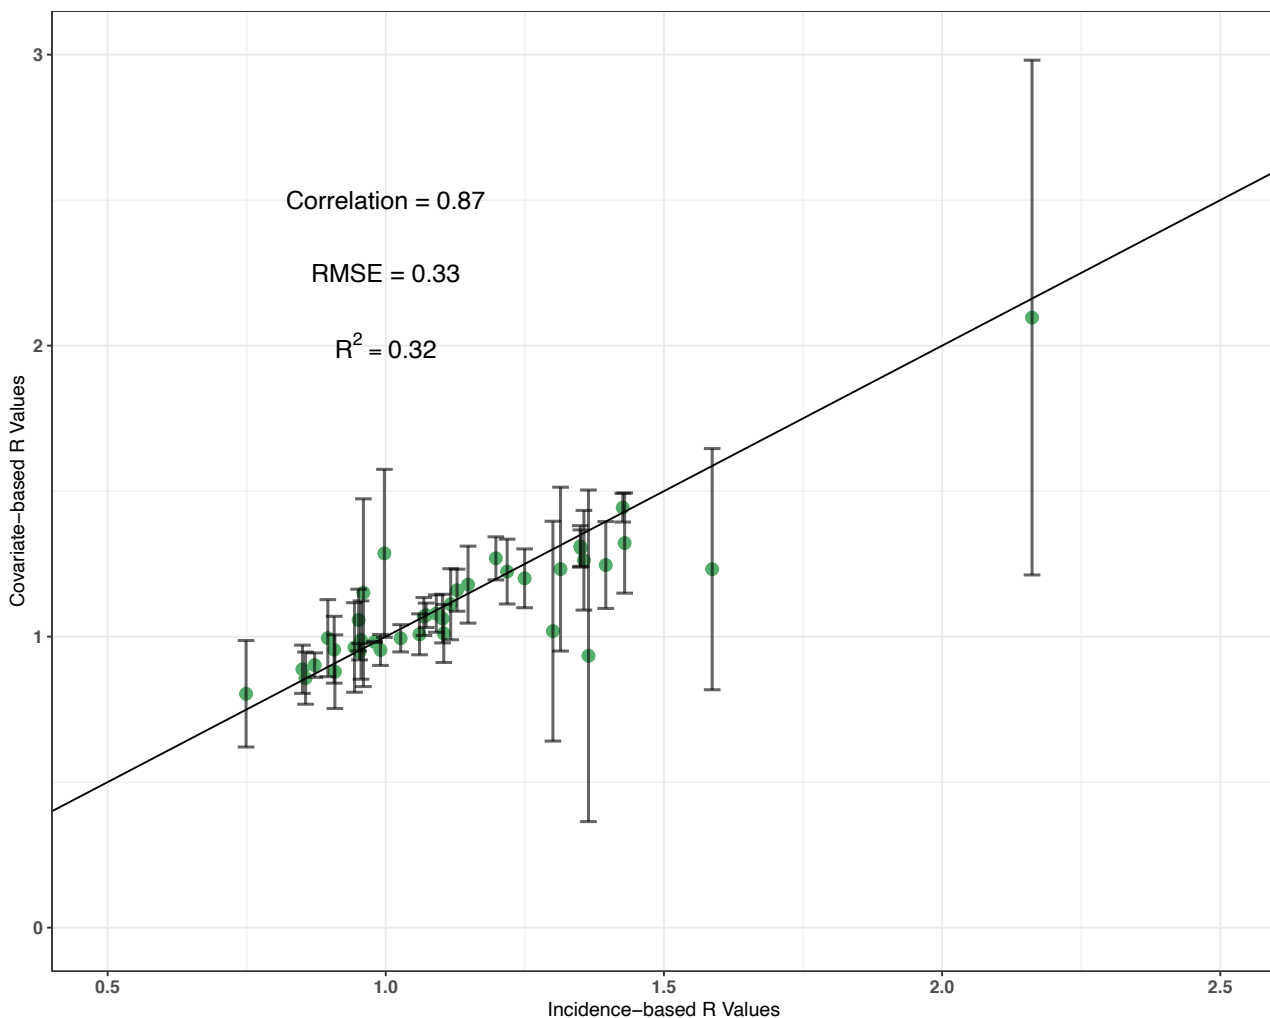

**Fig. 4: Incidence-based vs covariate-based R values for the best fit model fitted to the testing dataset.** The error bars show mean absolute error and the line is a linear trend line intercepting at 0.

103

104 *Nowcasting*

105 Using the best fit model, R was predicted for the remaining 31 states which did not have sufficient  
106 cases to be included in the R calculations and any missing dates for the six states which were  
107 included. This created estimates of R for all 37 states on a monthly temporal scale for 2018 and  
108 2019. The predictions provide further evidence that the model accurately predicts R, as the higher  
109 R values were in areas with known elevated cholera burden (northern and northeastern regions)  
110 and the states which only marginally fell below the threshold for R calculations (Fig. 5).

111

112

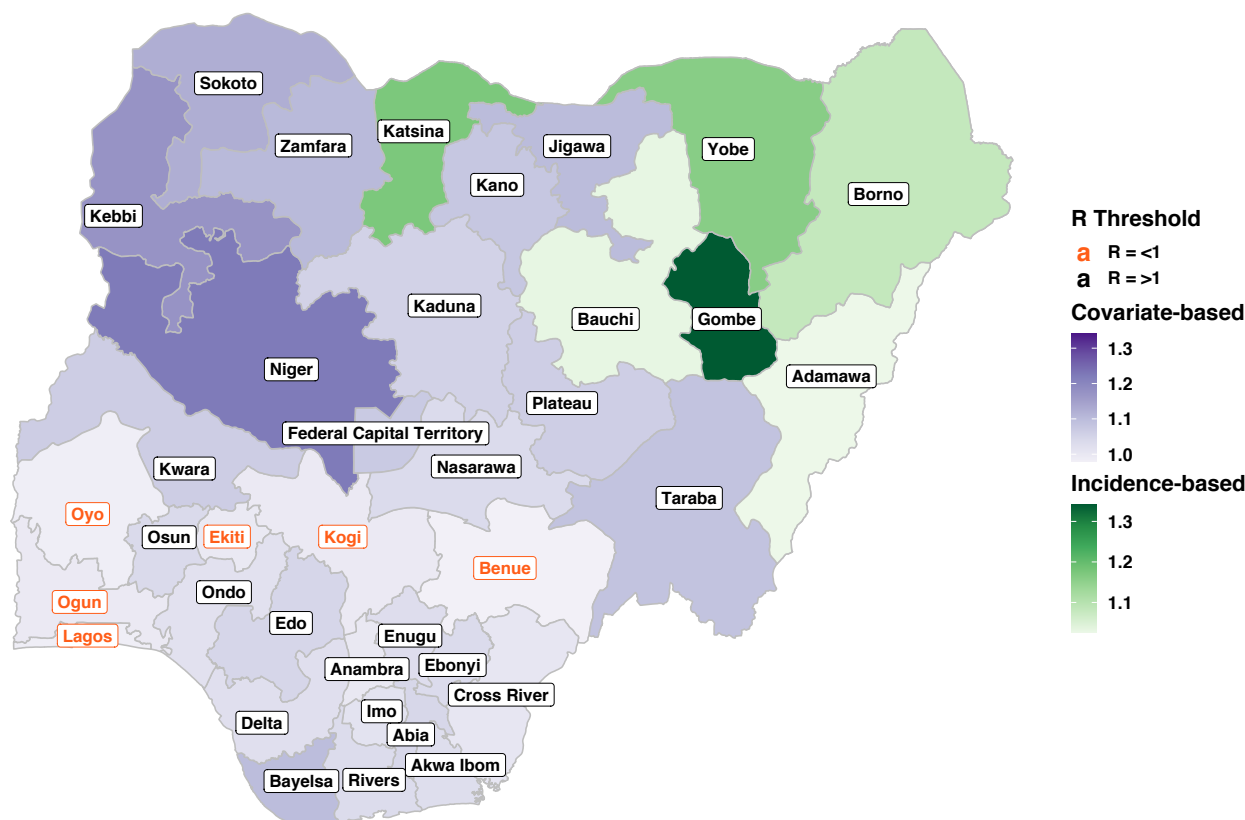

**Fig. 5: Average R values for 2018 and 2019 for all 37 Nigerian states.** Incidence-based (green) - the five states which met the equal to or more than 40 case thresholds. Covariate-based (purple) - the 31 states which did not meet the threshold and had R predicted using the best fit model. State label colour shows which states had an average R of  $R > 1$  (black) and  $R < 1$  (orange).

113

#### 114 *Traffic-Light System for Cholera Outbreak Risk*

115 Fig. 6 shows the predicted R values for the three traffic-light scenarios (Red = R over 1, Amber = R  
116 around 1 and Green = R less than 1) of cholera outbreak risk, based on the four selected covariates.  
117 Sanitation and MPI had a clear relationship with the R threshold, with consistently lower MPI (less  
118 poverty) and a higher proportion of people with access to sanitation seeing lower R values. R  
119 increased above 1 at 50% or lower for improved sanitation access and MPI values of above 0.32.  
120 The historical average sanitation level for  $R > 1$  was 52.8% for the full dataset, whereas for  $R < 1$   
121 it was 61.2%, for MPI the mean values were 0.27 and 0.13 for  $R > 1$  and  $R < 1$ , respectively.

122



123 In contrast, monthly conflict events and PDSI shows a less defined relationship, with conflict having  
 124 a wide range of values in each of the three traffic-light scenarios. For PDSI and conflict, R values  
 125 increased above 1 at around -1.1 for PDSI and monthly conflict events of 1.6. The historical spatial  
 126 trends for conflict and PDSI are presented in Supplementary Figure 1 and shows polarity in the  
 127 relationships between the selected social and environmental extremes and R values, which differ  
 128 between states.

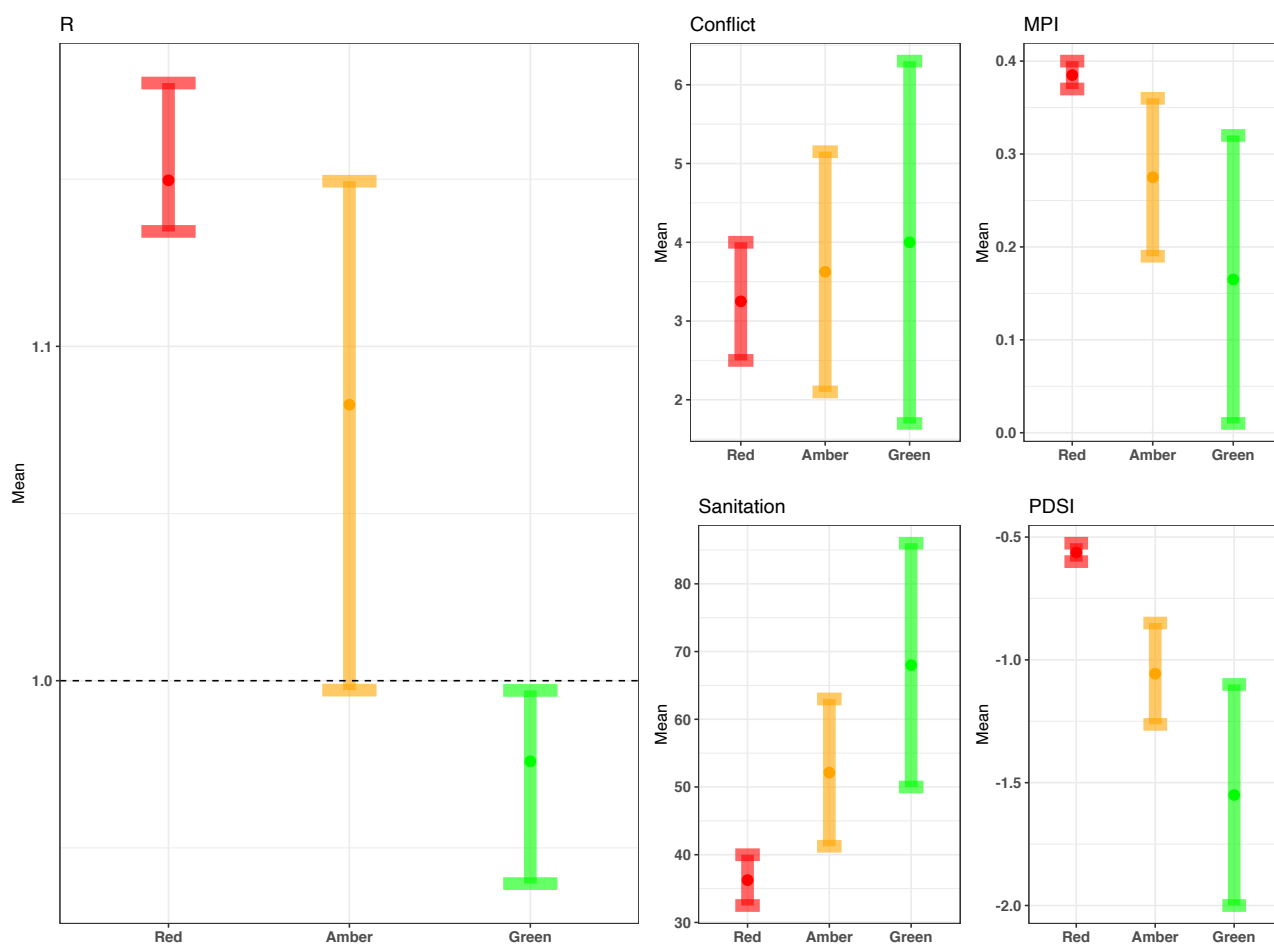

**Fig. 6: Traffic-light system of cholera risk.** The three traffic-light scenarios (Red = R over 1, Amber = R around 1 and Green = R less than 1) for each of the four covariates in the best fit model and the corresponding predicated R value using the best fit model.

129

130 *Spatial Heterogeneities*

131 *Conflict*

132 Borno and Kaduna were selected due to their clear positive relationship between conflict and R  
 133 (increased conflict and R = >1). The three traffic-light scenarios created for conflict in these two

134 states found a consistently high cholera outbreak risk. The Green traffic-light scenario was relatively  
135 small, with only a narrow range of conflict values causing R values less than 1. Both Kaduna and  
136 Borno have high levels of poverty and low access to sanitation (40-41% access). For Borno, raising  
137 monthly conflict events from 1 to 2 increased R above 1, but an increase in access to sanitation  
138 from 41-46% pushed the R value back below one. This relationship continued in a stepwise pattern  
139 and in a similar way for MPI but to a lesser degree. This showed that increasing sanitation and  
140 therefore decreasing vulnerability, allowed the states to adapt to increasing conflict and keep the R  
141 value below 1 (See Supplementary Figure 2).

142

### 143 *Drought*

144 Four states were investigated to evaluate the differences between extreme wetness (Lagos and  
145 Ekiti) and extreme dryness (Nasarawa and Kwara) and R values over 1. In contrast to Borno and  
146 Kaduna, all four states predicted consistently low R values (Supplementary Figs. 3 & 4), a potential  
147 explanation for this is the high variable importance of PDSI (Fig. 3) and the high levels of sanitation  
148 and low levels of poverty in all four states, contributing to overall lower predicted levels of cholera.  
149 Therefore, the model was detecting a signal in only small changes in PDSI, that resulted in changing  
150 R values which have not been detected in other states with higher rates of poverty and lower levels  
151 of sanitation access. It also helps to highlight the multi-directionality of the relationship between  
152 PDSI and cholera transmission, with both extreme wetness and extreme dryness causing increases  
153 in R.

154

### 155 **Discussion**

156 The results presented here show the importance of social and environmental extremes on cholera  
157 outbreaks in Nigeria, along with the importance of underlying vulnerability and socioeconomic  
158 factors. Of the 1,401 positive cases for Nigeria in 2018 and 2019, the northeast of the country and  
159 children under 5 carried the highest burden of disease, whereas there was minimal differentiation  
160 in cases between sex. Six states were used to calculate the R values, including Adamawa, Bauchi,  
161 Borno, Gombe, Katsina and Yobe. Twenty-one covariates were considered for model inclusion and

162 the best fit model according to the selected model performance measures (variable importance  
163 based on node impurity, RMSE,  $R^2$  and correlations) included monthly conflict events, percentage  
164 of the population with access to sanitation, MPI and PDSI. Using the best fit model, nowcasting was  
165 used to calculate the R values for the remaining thirty-one states which did not meet the threshold.

166

167 The predicted R values from the three traffic-light scenarios helped to shed light on the thresholds  
168 and triggers for raising R values above 1 in Nigeria. MPI and sanitation showed a well-defined  
169 relationship with R, with consistently higher access to sanitation and less poverty (lower MPI value)  
170 when R was less than 1. Thresholds which pushed R above one included decreasing access to  
171 sanitation below 50% and increasing the MPI above 0.32. Whereas the relationship between R and  
172 conflict events and PDSI appeared to vary spatially, with some states showing a negative and some  
173 states a positive association. For these two covariates, the effect on R was largely dependent on  
174 the access to sanitation and poverty within the states, with high levels of sanitation and low poverty  
175 resulting in a decreased effect of PDSI and conflict. This showed that better sustainable  
176 development in the state acted as a buffer to social and environmental extremes and allowed people  
177 to adapt to these events better, due to less pre-existing vulnerability.

178

179 According to the World Bank<sup>26</sup>, up to 47.3% (98 million people) of Nigeria's population live in  
180 multidimensional poverty. Poverty is a well-known risk factor for cholera, which is considered a  
181 disease of inequity<sup>27</sup>. Poverty can result in several risk factor cascades, which puts people at risk of  
182 not just cholera but several other diseases. Examples of these risks include poor access to WASH<sup>21</sup>,  
183 inadequate housing<sup>28</sup>, malnutrition<sup>29</sup> and overcrowding<sup>30</sup>. The expansion of sustainable  
184 development helps to reduce these risks and meeting or exceeding the Sustainable Development  
185 Goals would see significant gains in global health<sup>31</sup>. People living in poverty have fewer options and  
186 abilities to adapt to new and extreme situations, becoming trapped in the affected area or displaced  
187 to areas where their needs are not met. This provides further evidence for the need to reduce pre-  
188 existing vulnerabilities and to implement known techniques for reducing disasters<sup>32,33</sup>.

189

190 Poverty when measured in monetary terms alone can create issues due to its impact on the risk  
191 factors stated and is an advantage of using the MPI as a poverty indicator. Nigeria's cash transfer  
192 scheme has allowed many Nigerians to meet the household income limit for poverty but there is a  
193 case for turning these funds and attention onto structural reform<sup>34</sup>. Nigeria's nationwide average  
194 access to sanitation is around 25%, therefore using these funds to increase access to sanitation  
195 may significantly improve health<sup>35</sup>. Currently, 73% of the enteric disease burden in Nigeria is  
196 associated with inadequate WASH<sup>36</sup> and here we show the need for expansion of sanitation to  
197 reduce cholera risks and the shocks of extremes on its transmission. In a recent review on the  
198 implementation of non-pharmaceutical cholera interventions, there was generally a high acceptance  
199 of several WASH interventions. Despite this, education was key and building community  
200 relationships is needed to achieve this, such as understanding cultural differences and barriers<sup>37</sup>.  
201 This is especially important in areas with conflict, where trust between the government and residents  
202 may have been lost<sup>29</sup>.

203

204 Since 2002, Boko Haram (and Islamic State's West Africa Province) has been gaining a foothold  
205 and territory in northeastern Nigeria which has resulted in ongoing conflict, unrest and oppression  
206 of civilians<sup>38</sup>. Currently 5,860,200 people live in Borno state<sup>39</sup>, where the fighting has been most  
207 concentrated. Millions of people comprise conflict-affected populations globally and there is an  
208 increasing proportion of people living in early post conflict areas<sup>40</sup>. This is significant in terms of  
209 health and disease, as conflict has known risk factors for cholera along with several other  
210 diseases<sup>8,10,41</sup> and can worsen several of the social risk factors discussed above. Here, conflict was  
211 included in the best fit model and in some states, highly influential in terms of cholera transmission.  
212 Providing services and protecting health in conflict zones is especially challenging and coordination  
213 across organisations in reporting and operations are needed to streamline resources and prevent  
214 duplication of services<sup>42</sup>. The traffic-light system used here helps highlight what is needed in these  
215 situations to protect health and when outbreaks may occur.

216

217 PDSI and several of the other drought indices tested here showed high variable importance but, in  
218 some states, had only marginal influence on R predictions when the PDSI values were manipulated.  
219 When analysing spatial differences between R and PDSI, the relationship appears to be multi-  
220 directional, with both extreme wetness (PDSI = +4) and extreme dryness (PDSI = -4) associated  
221 with R values above 1. Furthermore, access to sanitation and poverty were important in how PDSI  
222 impacted R, similar to the impacts of conflict. There is significant evidence to show that both  
223 droughts<sup>7,11</sup> and floods<sup>12,43</sup> can cause cholera outbreaks and elevated transmission. Mechanisms  
224 through which this can occur includes a lack of water increasing risky drinking water behaviour and  
225 floods allowing for the dispersal of the pathogen. Nigeria has a varied climate across the country  
226 and therefore both extremes are likely to be felt by those living there. Cholera outbreaks have been  
227 seen in both the rainy and the dry season and the work presented here shows potential triggers for  
228 when extra vigilance is needed, especially in certain states. This immediate insight is important,  
229 while continually working to offset cholera risks from extremes through sanitation and hygiene,  
230 which can take significant time and resources<sup>44</sup>.

231

232 Despite adapting the methodology to account for this, a potential limitation may be lagged effects  
233 of the covariates on cholera<sup>45,46</sup>. Both long-term and short-term changes to the population may take  
234 time before changes in cholera transmission are evident. While some influences may be considered  
235 slow-onset or rapid-onset and therefore defining their beginning is subjective. Despite this, the  
236 incubation period of cholera is short (<2 hours - 5 days) and previous research has suggested that  
237 acute impacts cause increases in cholera cases within the first week of the event<sup>47-49</sup>. Calculating  
238 R on monthly sliding windows and using monthly covariate data helped to reduce potential lagged  
239 effects on the R values, which would be captured if the one-week lag estimate is applicable here.  
240 Although beyond the scope of the research presented here, the impacts of different lagged periods  
241 for several of these covariates and cholera outbreaks is an essential area of future research.

242

243 Cholera is considered an under-reported disease, and the lack of symptomatic cases means that  
244 many are likely to be missed. There are also incentives not to report cholera cases, due to travel

245 restrictions and isolations and implications for trade and tourism<sup>50</sup>. However, the robust reporting  
246 system in Nigeria suggests that the data used here is the best available for analysis. While during  
247 times of crisis, cholera may be over-reported or more accurately represent the cholera burden in  
248 the area. This is due to the presence of cholera treatment centres, increased awareness among the  
249 population and external assistance from non-governmental organization, detecting cases that may  
250 have been missed previously<sup>8</sup>.

251 The Global Task Force on Cholera Control's 2030 target of reducing cholera deaths by 90%<sup>51</sup> will  
252 require acceleration of current efforts and significant commitment. Increasing cholera research and  
253 data are important in achieving this and the traffic-light system for cholera risk presented here sheds  
254 light on ways to reduce cholera outbreaks in fragile settings. The results highlight the importance of  
255 extreme events on cholera transmission and how reducing pre-existing vulnerability could offset the  
256 resultant cholera risk. This research is the first time several disaster types and measures of  
257 population vulnerability have been evaluated together quantitatively in terms of cholera. We hope it  
258 shows the importance of doing so to gain a more accurate understanding of disease outbreaks in  
259 complex emergencies. Nigeria is currently working towards its ambitious goal of lifting 100 million  
260 people out of poverty by 2030<sup>34</sup>. If it is successful, this could significantly improve health, increase  
261 quality of life and decrease the risks of social and environmental extremes.

262

## 263 **Methods**

### 264 *Datasets*

265 Cholera data were obtained from NCDC and contained linelist data for 2018 and 2019. The data  
266 were age and sex-disaggregated, on a daily temporal scale and to administrative level 4. The data  
267 also provided information on the outcome of infection and whether the patient was hospitalised.  
268 The data were subset to only include cases that were confirmed either by rapid diagnostic tests or  
269 by laboratory culture and only these confirmed cases were used in the analyses.

270

271 A range of covariates were investigated based on previously understood cholera risk factors.  
272 Covariates included factors related to conflict (monthly, daily)<sup>52</sup>, drought (Palmer's Drought Severity  
273 Index, Standardised Precipitation Index)<sup>53,54</sup>, internally displaced persons (IDPs) (households,  
274 individuals)<sup>55</sup>, WASH (improved drinking water, piped water, improved sanitation, open defecation,  
275 basic hygiene)<sup>56</sup>, healthcare (total facilities, facilities per 100,000 people)<sup>52</sup>, population (total)<sup>57</sup> and  
276 poverty (MPI, headcount ratio in poverty, intensity of deprivation among the poor, severe poverty  
277 and population vulnerable to poverty)<sup>52</sup>.

278

279 Covariate data were on a range of spatial and temporal scales, therefore administrative level one  
280 (state) was set as the spatial granularity (data on a finer spatial scale were attributed to  
281 administrative level 1) and the finest temporal scale possible (daily) was used for covariate  
282 selection (repeating values if data were not available at the daily level). The datasets and methods  
283 used here were approved by Imperial College Research Ethics Committee and a data sharing  
284 agreement between NCDC and the authors.

285

### 286 *Incidence and R*

287 The 2018 and 2019 laboratory confirmed linelist data were used to calculate incidence. Incidence  
288 was calculated on a daily scale by taking the sum of the cases reported by state and date of onset  
289 of symptoms. This created a new dataset with a list of dates and corresponding daily incidence for  
290 each state. All analysis was completed in R with R Studio version 4.1.0. (packages "incidence"<sup>58</sup> &  
291 "EpiEstim"<sup>59</sup>).

292

293 Rather than using incidence as the outcome variable (which has less implicit assumptions), R was  
294 calculated, as it is more descriptive providing information on epidemic evolution (e.g.,  $R > 1$ , cases  
295 are increasing), instead of new reported disease cases for a single time point. R was calculated  
296 from incidence using the parametric standard interval method, which uses the mean and the  
297 standard deviation of the standard interval (SI). SI is the time from illness onset in the primary case

298 to onset in the secondary case and therefore impacts the evolution of the epidemic and speed of  
299 transmission. The SI for cholera is well-documented and there are several estimates in the  
300 literature<sup>60-62</sup>. To account for this reported variation in SI, a sensitivity analysis was conducted with  
301 SI set at 3, 5 and 8 days with a standard deviation of 8 days. The parametric method was used (vs  
302 the non-parametric which uses a discrete distribution), as this can be adequately modelled by  
303 a normal probability distribution and has a fixed set of parameters.

304

305 Estimating R too early in an epidemic increases error, as R calculations are less accurate when  
306 there is lower incidence over a time window. A way to understand how much this impacts R values  
307 is to use the coefficient of variation (CV), which is a measure of how spread out the dataset values  
308 are relative to the mean. The lower the value, the lower the degree of variation in the data. A  
309 coefficient of variation threshold was set to 0.3 (or less) as standard, based on previous work<sup>59</sup>. To  
310 reach the CV threshold, calculation start date for each state was altered until the threshold CV was  
311 reached. States with <40 cases were removed, as states with fewer cases did not have high enough  
312 incidence across the time window to reach the CV threshold. Additionally, R values were calculated  
313 over monthly sliding windows, to ensure sufficient cases were available for analysis within the time  
314 window.

315

### 316 *Covariate Selection and Random Forest Models*

317 Supervised machine learning algorithms such as decision-tree based algorithms, are now a widely  
318 used method for predicting disease outcomes and risk mapping<sup>63,64</sup>. They work by choosing data  
319 points randomly from a training set and building a decision tree to predict the expected value given  
320 the attributes of these points. Transparency is increased by allowing the number of trees  
321 (estimators), number of features at each node split and resampling method to be specified. Random  
322 Forests (RF) then combines several decision trees into one model, which has been shown to  
323 increase predictive accuracy over single tree approaches, while also dealing well with interactions  
324 and non-linear relationships<sup>65,66</sup>.

325



326 The covariates listed above (conflict, drought, IDPs, WASH, healthcare, population and poverty)  
327 were first clustered to assist in the selection of covariates for model inclusion and to understand any  
328 multicollinearities. Despite RF automatically reducing correlation through subsetting data and tuning  
329 the number of trees and depth<sup>64,67</sup>, the process here lends support that the final model is measuring  
330 somewhat independent processes and not purely overfitting the same patterns<sup>63</sup>. The clustering  
331 was based on the correction between the covariates meeting an absolute pairwise correlation of  
332 above 0.75. A secondary covariate selection process was run during preliminary analysis and acted  
333 as a method of validation. The process is detailed in Supplementary Information 1.

334

335 Random forest variable importance was used to rank all 21 clustered covariates. Variable  
336 importance provided an additional method of guiding the fitting of the best fit model, by testing the  
337 covariates which found the highest variable importance first. In this context, variable importance is  
338 a measure of the cumulative decreasing mean standard error each time a variable is used as a  
339 node split in a tree. The remaining error left in predictive accuracy after a node split is known as  
340 node impurity and a variable which reduces this impurity is considered more important.

341

342 Training (70% of data) and testing (30%) datasets were created to train the model and test the  
343 model's predictive performance. Random forest regression models (as opposed to classification  
344 models) were used since the outcome variable (R) is continuous. The parameters for training were  
345 set to repeated cross-validation for the resampling method, with ten resampling interactions and  
346 five complete sets of folds to complete. The model was tuned and estimated an optimal number of  
347 predictors at each split of 2, based on the lowest out-of-bag (OOB) error rate with RMSE used as  
348 the evaluation metric (package "caret"<sup>68</sup>).

349

350 A stepwise analysis was used to fit the models under each SI condition (3, 5 & 8 days), taking into  
351 consideration the covariate clustering and variable importance. One covariate was selected from  
352 each cluster, and all combinations of covariates were tested until the best-fit model was found.

353 Models were assessed against each other in terms of predictive accuracy, based upon R<sup>2</sup> and  
354 RMSE. Predictions were then calculated on the testing dataset to compare incidence-based (R  
355 values calculated using the incidence data) vs covariate-based R values (R values calculated  
356 through model predictions). The terms, actual vs predicted was not used here, as all R values  
357 were modelled making the term “actual” misleading in this context. Model performance  
358 evaluations were built on multiple metrics including correlation, R<sup>2</sup> and RMSE.

359

360 Despite random forest models being accurate and powerful for prediction, they are easily over-fit  
361 (fitting to the testing dataset too closely or exactly) and therefore calculating error for the  
362 predictions are important. Little to no error in the predictions are an indication of over-fitting which  
363 can occur through predictions based off too small a dataset, more parameters than can be  
364 justified by the data and multicollinearity. Here, error was calculated using mean absolute error  
365 (MAE), where  $y_i$  is the prediction and  $x_i$  is the true value, with the total number of data points as  $n$ .

$$MAE = \frac{\sum_{i=1}^n |y_i - x_i|}{n}$$

366

367 *Nowcasting*

368 The best fit model, in terms of predictive power according to the metrics above, was used to predict  
369 R for the remaining states which did not have sufficient reported cases to calculate R using  
370 incidence or had missing data for certain dates. Data for the best fit model covariates were collected  
371 for the states and missing dates from the sources given above. The data for the selected covariates  
372 are shown spatially in Supplementary Figure 5.

373

374 *Traffic-Light System for Cholera Outbreak Risk*

375 The best fit model was then used to predict the traffic-light system for cholera outbreak risk, by  
376 manipulating the covariates values and using these to predict R. The traffic light system was defined  
377 by:

378 • Red - Covariate values which pushed R over 1

379 • Amber - Covariates values with predicted R around 1

380 • Green - Covariate values which predicted R below 1.

381 By using these three traffic-light scenarios, cholera outbreak triggers were identified based on the  
382 conditions of the four selected covariates. No specific R value had to be met for each traffic-light  
383 scenario, to account for the complexity of the relationships and non-linearity (Supplementary Figs.  
384 6 & 7). To illustrate the historical trends between the best fit model covariates and the R thresholds  
385 ( $R > 1$ ,  $R < 1$ ), the data is split both spatially (by month) and temporally (by state) in Supplementary  
386 Figs. 1 & 8.

387

### 388 *Spatial Heterogeneities*

389 To understand spatial differences in the relationship between the selected social and environmental  
390 extremes (conflict and PDSI) and cholera outbreak risk and the role pre-existing vulnerabilities played  
391 in altering these relationships, six states were selected for additional analysis. These states were  
392 selected because they had either a clear positive or clear negative relationship with conflict or PDSI  
393 and R (PDSI is hypothesised to increase R at either end of the scale, +4/-4) and included Borno,  
394 Kaduna, Nasarawa, Ekiti, Lagos and Kwara (see Supplementary Figure 1). The processes above  
395 for predicting R under the three traffic-light scenarios was repeated for the six states but only PDSI  
396 and conflict values were manipulated, keeping the other three covariates at the mean value for  $R =$   
397  $> 1$  across the full dataset for the state. The spatial analyses identified the thresholds in conflict and  
398 PDSI needed to push R values below 1.

399

### 400 **References**

- 401 1. Ali, M., Nelson, A. R., Lopez, A. L. & Sack, D. A. Updated global burden of cholera in endemic  
402 countries. *PLoS Neglect. Trop. Dis.* **9**, e0003832 (2015).
- 403 2. Carter, S. E. et al. What questions we should be asking about COVID-19 in humanitarian  
404 settings: perspectives from the social sciences analysis cell in the Democratic Republic of the  
405 Congo. *BMJ Glob. Health.* **5**, e003607 (2020).

- 406 3. Musa, S. S. et al. Dual tension as Nigeria battles cholera during the COVID-19 pandemic. *Clin.*  
407 *Epidemiology Glob Health.* **12** (2021).
- 408 4. King, A. A., Ionides, E. L., Pascual, M. & Bouma, M. J. Inapparent infections and cholera  
409 dynamics. *Nature* **454**, 877-880 (2008).
- 410 5. Anbarci, N., Escaleras, M. & Register, C. A. From cholera outbreaks to pandemics: the role of  
411 poverty and inequality. *Working Paper 05003* (Florida Atlantic University, FL, 2006).
- 412 6. Elimian, K.O. et al. Descriptive epidemiology of cholera outbreak in Nigeria, January–November,  
413 2018: implications for the global roadmap strategy. *BMC Public Health* **19**, 1-11 (2019).
- 414 7. Charnley, G. E. C., Kelman, I., Green, N., Hinsley, W., Gaythorpe, K. A. M. & Murray, K. A.  
415 Exploring relationships between drought and epidemic cholera in Africa using generalised linear  
416 models. *BMC Infect. Dis.* **21**, 1-12 (2021).
- 417 8. Charnley, G. E. C., Jean, K., Kelman, I., Gaythorpe, K. A. M. & Murray, K. A. Using self-  
418 controlled case series to understand the relationship between conflict and cholera in Nigeria and  
419 the Democratic Republic of Congo. Preprint at <https://doi.org/10.1101/2021.10.19.21265191>  
420 (2021).
- 421 9. Charnley, G. E. C., Kelman, I., Gaythorpe, K. A. M. & Murray, K. A. Traits and risk factors of  
422 post-disaster infectious disease outbreaks: a systematic review. *Sci. Rep.* **11**, 1-4 (2021).
- 423 10. Wells, C. R. et al. The exacerbation of Ebola outbreaks by conflict in the Democratic Republic  
424 of the Congo. *PNAS.* **116**, 24366-72 (2019).
- 425 11. Rieckmann, A., Tamason, C. C., Gurley, E. S., Rod, N. H. & Jensen, P. K. Exploring droughts  
426 and floods and their association with cholera outbreaks in sub-Saharan Africa: a register-  
427 based ecological study from 1990 to 2010. *Am. J. Trop. Med. Hyg.* **98**, 1269 (2018).
- 428 12. Jutla, A. et al. Environmental factors influencing epidemic cholera. *Am. J. Trop. Med. Hyg.* **89**,  
429 597 (2013).
- 430 13. Elimian, K. O. et al. What are the drivers of recurrent cholera transmission in Nigeria? Evidence  
431 from a scoping review. *BMC Public Health.* **20**, 1-3 (2020).

- 432 14. Lessler, J. et al. Mapping the burden of cholera in sub-Saharan Africa and implications for  
433 control: an analysis of data across geographical scales. *Lancet* **391**, 1908-1915 (2018).
- 434 15. Dalhat, M. M. et al. Descriptive characterization of the 2010 cholera outbreak in Nigeria. *BMC*  
435 *Public Health*. **14**, 1-7 (2014).
- 436 16. Ngwa, M. C. et al. The multi-sectorial emergency response to a cholera outbreak in internally  
437 displaced persons camps in Borno state, Nigeria, 2017. *BMJ Glob. Health*. **5**, e002000 (2020).
- 438 17. Sule, I. B., Yahaya, M., Aisha, A. A., Zainab, A. D., Ummulkhulthum, B. & Nguku, P. Descriptive  
439 epidemiology of a cholera outbreak in Kaduna State, Northwest Nigeria, 2014. *Pan Afr. Med.*  
440 *J.* **27**, (2017).
- 441 18. Adeneye, A. K. et al. Risk factors associated with cholera outbreak in Bauchi and Gombe States  
442 in North East Nigeria. *J. Public Health Epidemiol.* **8**, 286-296 (2016).
- 443 19. De Magny, G. C., Guégan, J. F., Petit, M. & Cazelles, B. Regional-scale climate-variability  
444 synchrony of cholera epidemics in West Africa. *BMC Infect. Dis.* **7**, 1-9 (2007).
- 445 20. Abdussalam, A. F. Modelling the climatic drivers of cholera dynamics in Northern Nigeria using  
446 generalised additive models. *Int. J. Geogr. Environ. Manage.* **2**, 84-97 (2016).
- 447 21. Gidado, S. et al. Cholera outbreak in a naïve rural community in Northern Nigeria: the  
448 importance of hand washing with soap, September 2010. *Pan Afr. Med. J.* **30** (2018).
- 449 22. Hutin, Y., Luby, S., Paquet, C. A large cholera outbreak in Kano City, Nigeria: the importance of  
450 hand washing with soap and the danger of street-vended water. *J. Water Health.* **1**, 45-52  
451 (2003).
- 452 23. Dan-Nwafor, C. C. et al. A cholera outbreak in a rural north central Nigerian community: an  
453 unmatched case-control study. *BMC Public Health* **19**, 1-7 (2019).
- 454 24. Leckebusch, G. C. & Abdussalam, A. F. Climate and socioeconomic influences on interannual  
455 variability of cholera in Nigeria. *Health Place.* **34**, 107-117 (2015).
- 456 25. United Nations Statistical Division. Millennium Development Goal Indicators.  
457 <https://unstats.un.org/unsd/mdg/SeriesDetail.aspx?srid=580> (2015).

- 458 26. World Bank. Tackling poverty in multiple dimensions: A proving ground in Nigeria.  
459 [https://blogs.worldbank.org/opendata/tackling-poverty-multiple-dimensions-proving-ground-](https://blogs.worldbank.org/opendata/tackling-poverty-multiple-dimensions-proving-ground-nigeria)  
460 [nigeria](https://blogs.worldbank.org/opendata/tackling-poverty-multiple-dimensions-proving-ground-nigeria) (2021).
- 461 27. Talavera, A. & Perez, E. M. Is cholera disease associated with poverty?. *J. Infect. in Dev.*  
462 *Countr.* **3**, 408-11 (2009).
- 463 28. Penrose, K., Castro, M. C., Werema, J. & Ryan, E. T. Informal urban settlements and cholera  
464 risk in Dar es Salaam, Tanzania. *PLoS Neglect. Trop. Dis.* **4**, e631 (2010).
- 465 29. Charnley, G. E. C., Kelman, I. & Murray, K. A. Drought-related cholera outbreaks in Africa and  
466 the implications for climate change: a narrative review. *Pathog. Glob. Health.* 1-10 (2021).
- 467 30. Ververs, M. & Narra, R. Treating cholera in severely malnourished children in the Horn of Africa  
468 and Yemen. *Lancet.* **390**, 1945-6 (2017).
- 469 31. von Schirnding Y. Health and sustainable development: can we rise to the challenge?. *Lancet.*  
470 **360**, 632-7 (2002).
- 471 32. Masozera, M., Bailey, M. & Kerchner, C. Distribution of impacts of natural disasters across  
472 income groups: A case study of New Orleans. *Ecol. Econ.* **63**, 299-306 (2007).
- 473 33. Lahsen, M. & Ribot, J. Politics of attributing extreme events and disasters to climate change.  
474 *Wiley Interdiscip. Rev. Clim. Change.* **13**, e750 (2022).
- 475 34. Onyeiwu, S. *Nigeria's poverty profile is grim. It's time to move beyond handouts.*  
476 [https://theconversation.com/nigerias-poverty-profile-is-grim-its-time-to-move-beyond-handouts-](https://theconversation.com/nigerias-poverty-profile-is-grim-its-time-to-move-beyond-handouts-163302)  
477 [163302](https://theconversation.com/nigerias-poverty-profile-is-grim-its-time-to-move-beyond-handouts-163302) (2021).
- 478 35. Ajisegiri, B. et al. Geo-spatial modeling of access to water and sanitation in Nigeria. *J. Water*  
479 *Sanit. Hyg. Dev.* **9**, 258-80 (2019).
- 480 36. World Bank Group. A Wake Up Call: Nigeria Water Supply, Sanitation, and Hygiene Poverty  
481 Diagnostic. World Bank; 2017 Aug.
- 482 37. Polonsky, J. A. et al. Feasibility, acceptability, and effectiveness of non-pharmaceutical  
483 interventions against infectious diseases among crisis-affected populations: a scoping review.  
484 *Infect. Dis. Poverty.* **11**, 1-9 (2022).

- 485 38. Falode, J. A. The nature of Nigeria's Boko Haram war, 2010-2015: A strategic analysis.  
486 *Perspect. Terror.* **10**, 41-52 (2016).
- 487 39. Borno State Government. Population. <https://bornostate.gov.ng/population/> (2016).
- 488 40. Garfield, R. M., Polonsky, J. & Burkle, F. M. Changes in size of populations and level of conflict  
489 since World War II: implications for health and health services. *Disaster Med Public Health Prep.*  
490 **6**, 241-6 (2012).
- 491 41. Federspiel F, Ali M. The cholera outbreak in Yemen: lessons learned and way forward. *BMC*  
492 *public health.* 2018 Dec;18(1):1-8.
- 493 42. Ricau, M., Lacan, L., Ihemezue, E., Lantagne, D. & String, G. Evaluation of monitoring tools  
494 for WASH response in a cholera outbreak in northeast Nigeria. *J. Water Sanit. Hyg. Dev.* **11**,  
495 972-82 (2021).
- 496 43. Sidley, P. Floods in southern Africa result in cholera outbreak and displacement. *BMJ* **336**, 471  
497 (2008).
- 498 44. Onwe, F. I., Agu, A. P., Umezuruike, D. & Ogbonna, C. Factors responsible for the 2015  
499 Cholera outbreak and spread in Ebonyi state, Nigeria. *J. Epidemiol. Soc. Nigeria.* **2**, 53-58  
500 (2018).
- 501 45. Reyburn, R., Kim, D. R., Emch, M., Khatib, A., Von Seidlein, L. & Ali, M. Climate variability and  
502 the outbreaks of cholera in Zanzibar, East Africa: a time series analysis. *Am. J. Trop. Med. Hyg.*  
503 **84**, 862 (2011).
- 504 46. Emch, M., Feldacker, C., Yunus, M., Streatfield, P. K., DinhThiem, V. & Ali, M. Local  
505 environmental predictors of cholera in Bangladesh and Vietnam. *Am. J. Trop Med. Hyg.* **78**, 823-  
506 32 (2008).
- 507 47. Fredrick, T. et al. Cholera outbreak linked with lack of safe water supply following a tropical  
508 cyclone in Pondicherry, India, 2012. *J. Health. Popul. Nutr.* **33**, 31 (2015).
- 509 48. Bhunia, R. & Ghosh, S. Waterborne cholera outbreak following cyclone Aila in Sundarban area  
510 of West Bengal, India, 2009. *Trans R Soc Trop.* **105**, 214-219 (2011).

- 511 49. Jeandron, A. et al. Water supply interruptions and suspected cholera incidence: a time-series  
512 regression in the Democratic Republic of the Congo. *PLoS Med.* **12**, e1001893 (2015).
- 513 50. Ganesan, D., Gupta, S. S. & Legros, D. Cholera surveillance and estimation of burden of  
514 cholera. *Vaccine* **38**, A13-7 (2020).
- 515 51. Global Task Force on Cholera Control. Roadmap 2030. [https://www.gtfcc.org/about-](https://www.gtfcc.org/about-gtfcc/roadmap-2030/)  
516 [gtfcc/roadmap-2030/](https://www.gtfcc.org/about-gtfcc/roadmap-2030/) (2020).
- 517 52. HDX. The Humanitarian Data Exchange. <https://data.humdata.org> (2021).
- 518 53. University of East Anglia. Climate Research Unit. [https://www.uea.ac.uk/groups-and-](https://www.uea.ac.uk/groups-and-centres/climatic-research-unit)  
519 [centres/climatic-research-unit](https://www.uea.ac.uk/groups-and-centres/climatic-research-unit) (2020).
- 520 54. CEDA. High resolution Standardized Precipitation Evapotranspiration Index (SPEI) dataset for  
521 Africa. <https://catalogue.ceda.ac.uk/uuid/bbdfd09a04304158b366777eba0d2aeb> (2019).
- 522 55. IOM. DTM Nigeria. <https://displacement.iom.int/nigeria> (2021).
- 523 56. JMP. Nigeria. <https://washdata.org> (2020).
- 524 57. WorldBank. Data Bank Subnational Population.  
525 <https://databank.worldbank.org/source/subnational-population> (2021).
- 526 58. Kamvar, Z. N., Cai, J., Pulliam, J. R. C., Schumacher, J. & Jombart, T. Epidemic curves made  
527 easy using the R package incidence <https://doi.org/10.12688/f1000research.18002.1> (2019).
- 528 59. Cori, A. EpiEstim: Estimate Time Varying Reproduction Numbers from Epidemic Curves. R  
529 package version 2.2-4. <https://CRAN.R-project.org/package=EpiEstim> (2021).
- 530 60. Azman, A. S. et al. Urban cholera transmission hotspots and their implications for reactive  
531 vaccination: evidence from Bissau city, Guinea bissau. *PLoS Neglect Trop. Dis.* **6**, e1901 (2012).
- 532 61. Azman, A. S. et al. Population-level effect of cholera vaccine on displaced populations, South  
533 Sudan, 2014. *Emerg. Infect. Dis.* **22**, 1067 (2016).
- 534 62. Kahn, R. et al. Incubation periods impact the spatial predictability of cholera and Ebola outbreaks  
535 in Sierra Leone. *PNAS.* **117**, 5067-73 (2020).
- 536 63. Hamlet A, Ramos DG, Gaythorpe KA, Romano AP, Garske T, Ferguson NM. Seasonality of  
537 agricultural exposure as an important predictor of seasonal yellow fever spillover in Brazil. *Nat.*  
538 *Commun.* **12**, 1-1 (2021).



- 539 64. Kapwata T, Gebreslasie MT. Random forest variable selection in spatial malaria transmission  
540 modelling in Mpumalanga Province, South Africa. *Geospat. Health*. **11**, 251-262 (2016).
- 541 65. Breiman, L. Random forests. *Mach. Learn.* **45**, 5-32 (2001).
- 542 66. Biau, G. Analysis of a random forests model. *J. Mach. Learn. Res.* **13**, 1063-95 (2012).
- 543 67. Genuer R, Poggi JM, Tuleau-Malot C. Variable selection using random forests. *Pattern*  
544 *Recognit. Lett.* **31**, 2225-36 (2010).
- 545 68. Kuhn, M. caret: Classification and Regression Training. [https://CRAN.R-](https://CRAN.R-project.org/package=caret)  
546 [project.org/package=caret](https://CRAN.R-project.org/package=caret) (2021).

547

## 548 **Acknowledgements**

549 We would like to thank and acknowledgement the Nigeria Centre for Disease Control for providing  
550 the data used here and those who work for the NCDC who collected the data in the field. We would  
551 also like to thank Anwar Musah (University College London) and Kelly Elimian (Karolinska Institutet)  
552 for their guidance on cholera data for Nigeria and facilitating the partnership with NCDC. This work  
553 was supported by the Natural Environmental Research Council [NE/S007415/1], as part of the  
554 Grantham Institute for Climate Change and the Environment's (Imperial College London) Science  
555 and Solutions for a Changing Planet Doctoral Training Partnership. We also acknowledge joint  
556 Centre funding from the UK Medical Research Council and Department for International  
557 Development [MR/R0156600/1].

558

## 559 **Author Contributions**

560 GECC was part of the study design and conceptualisation of ideas, ran the analysis, wrote and  
561 finalised the manuscript and incorporated any feedback. SY & CO provided the cholera datasets,  
562 facilitated the data sharing agreement and provided expertise on cholera in Nigeria. IK offered  
563 expertise on disasters and health, provided expertise in the methodology and revised several  
564 drafts. KAMG was part of the study design and conceptualisation of ideas, provided expertise in  
565 the methodology, provided supervision and revised several drafts. KAM was part of the study

566 design and conceptualisation of ideas, provided expertise in the methodology, provided  
567 supervision and revised several drafts. All authors have read and approved the manuscript.

568

569 **Competing interests**

570 The authors declare no competing interests.

## Supplementary Material

### Supplementary Information 1: Additional covariate selection using linear regression

The same 21 covariates (conflict, drought IDPs, WASH, healthcare, population and poverty) analysed using variable importance were also run through an additional covariate selection process and stepwise analysis as developed by:

1. Garske, T. et al. Yellow fever in Africa: estimating the burden of disease and impact of mass vaccination from outbreak and serological data. *PLoS Med.* **11**, e1001638 (2014).
2. Gaythorpe, K. A. M. et al. The global burden of yellow fever. *Elife* **10**, e64670 (2021).

The selection process removes covariates that are not significantly associated with the outcome variable (Rt3, Rt5, Rt8) at  $p < 0.1$  using linear regression. It then clusters the remaining covariates based on the correlation between them at an absolute pairwise correlation of above 0.75.

Ten were removed, either because they were not significantly associated with the outcome variable (R) or because they were too highly correlated with other covariates (healthcare facilities, piped water, open defecation, population, IDPs, severe poverty, vulnerable to poverty, basic hygiene). Eleven covariates remained and were grouped into five clusters, the clusters and variable importance of each covariate are shown below

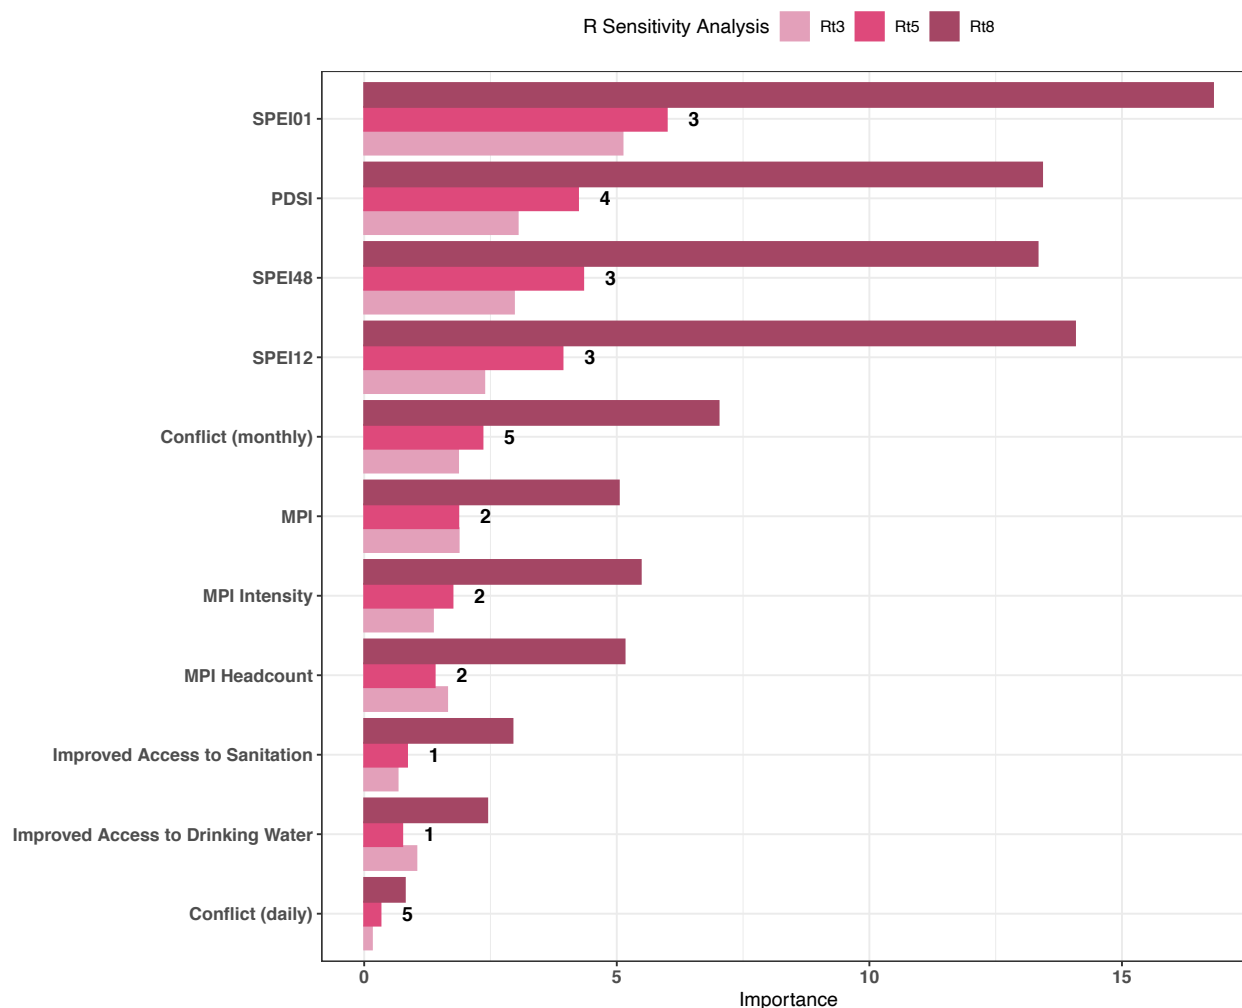

**The variable importance for the eleven remaining covariates after variable selection.** All three serial interval values tested are shown (Rt3 - 3 days, Rt5 - 5 days, Rt8 - 8 days) and the numbers represent the clusters. SPEI01, 12, 48 - Standardised Precipitation Index calculated on 1, 12 and 48 month scale. PDSI - Palmers Drought Severity Index. MPI - Multidimensional Poverty Index.

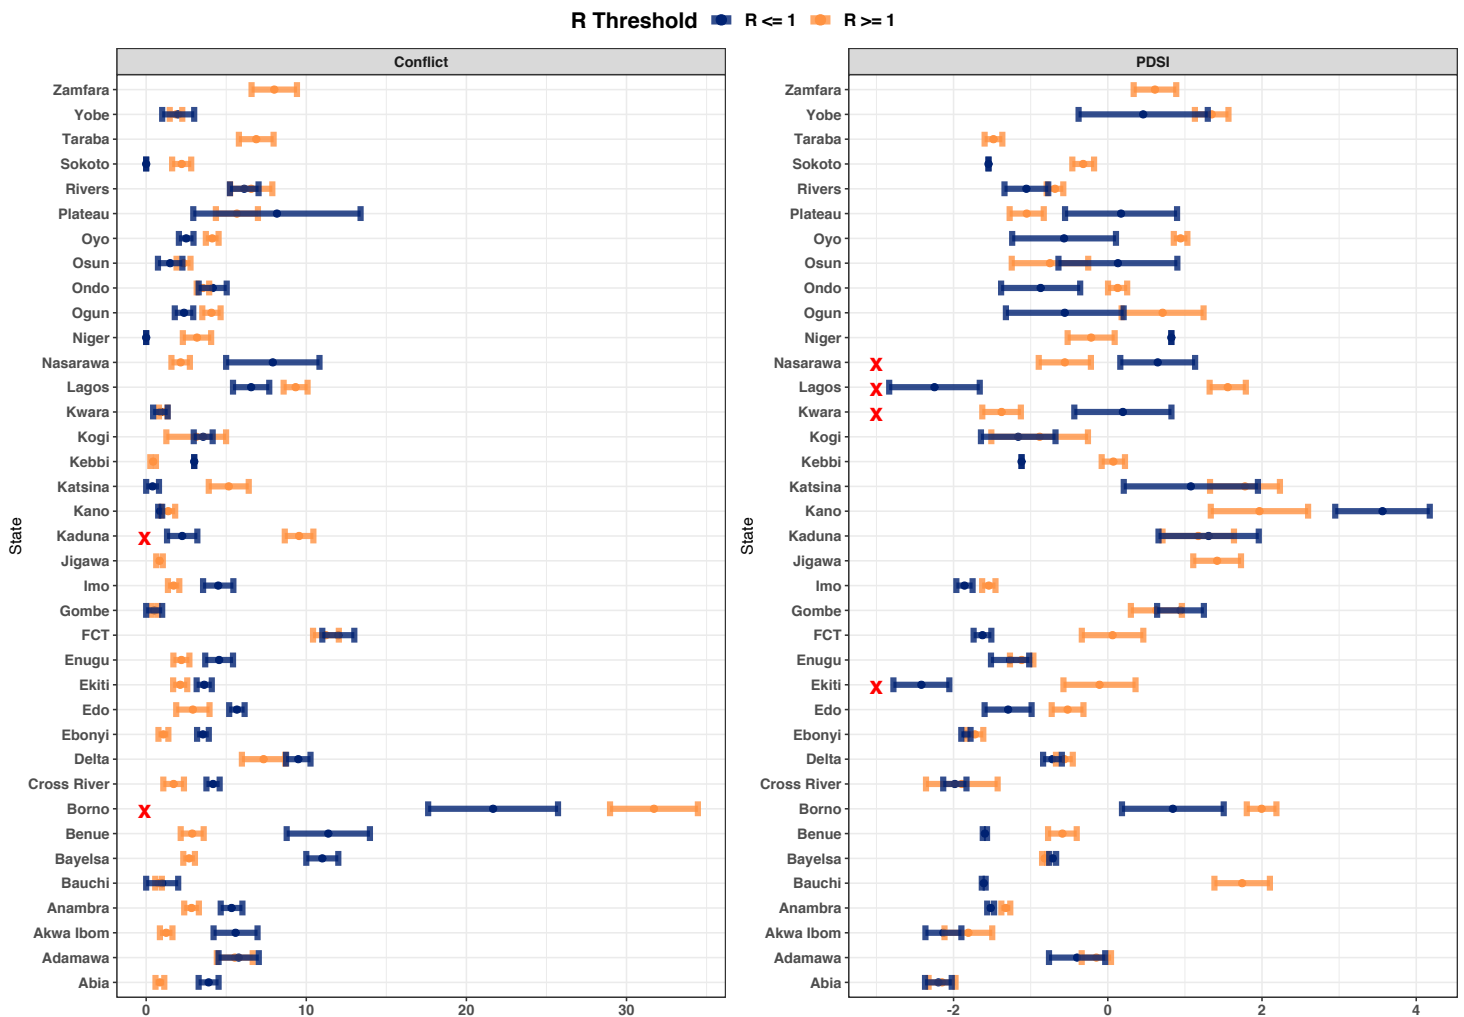

**Supplementary Figure 1: Historical spatial trends between the selected social and environmental extremes (conflict and PDSI) and the R thresholds ( $R \geq 1$ ,  $R < 1$ ).** The mean and standard error for the two covariates for the full dataset split by state and R threshold. The red “x” shows the states which were included in the sub-national analysis: Conflict (Borno and Kaduna), extreme wetness (Lagos and Ekiti), extreme dryness (Nasarawa and Kwara).

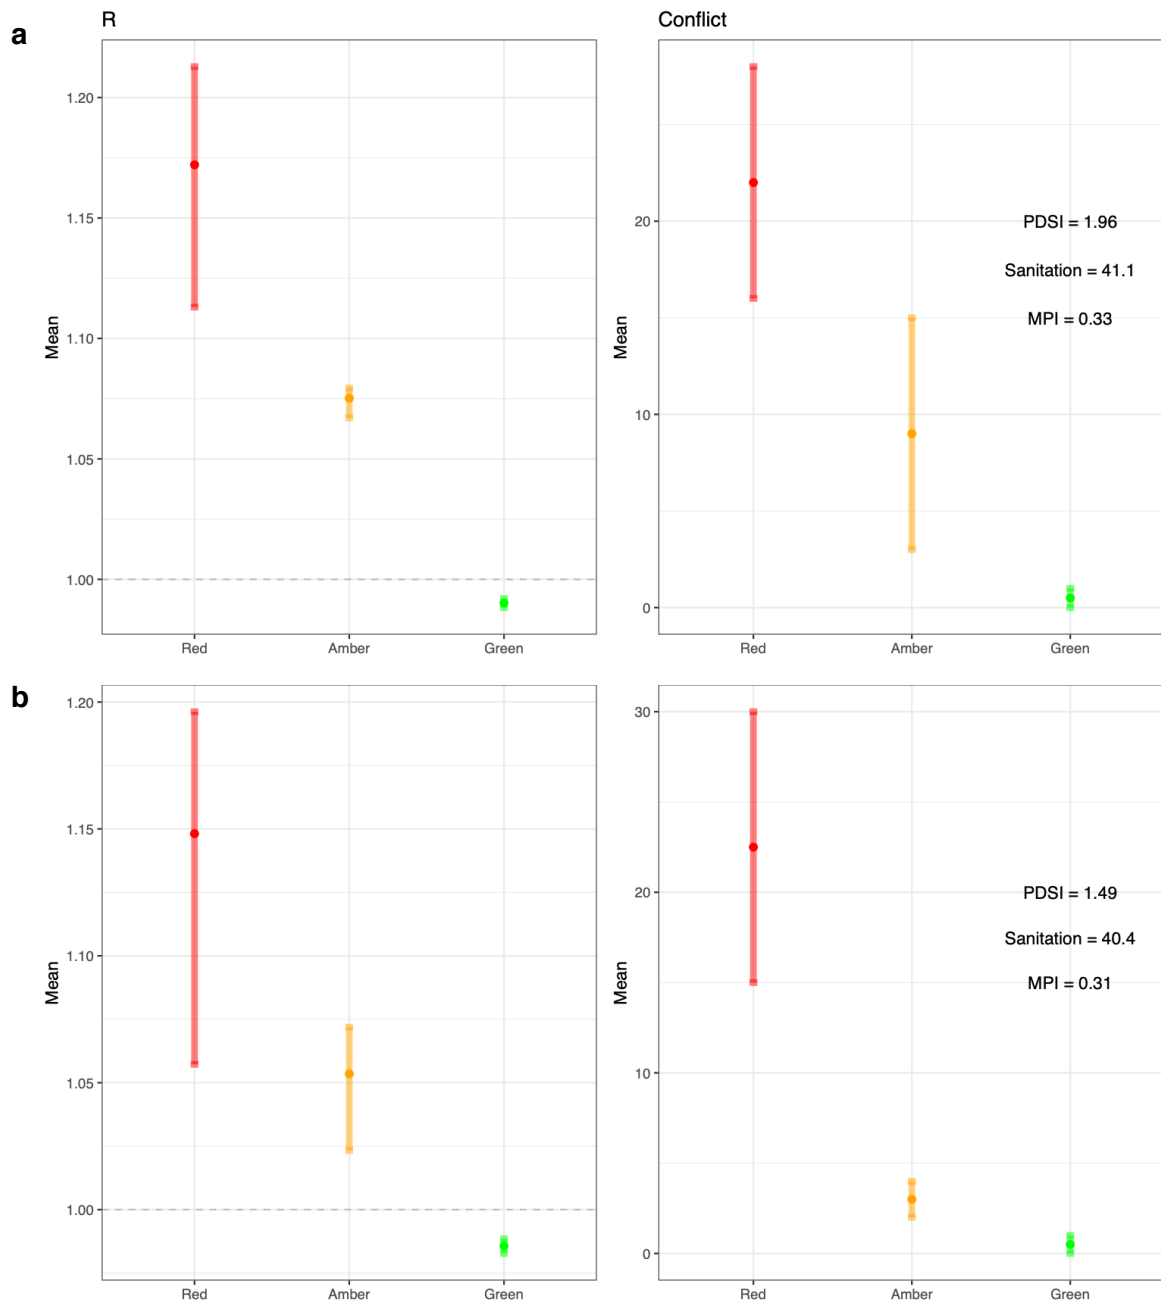

**Supplementary Figure 2: Three traffic-light scenarios for conflict only and the corresponding predicted R values.** The other three (PDSI, Sanitation and MPI) covariate values were retained at the mean value for  $R > 1$  for the full dataset (values shown in the plot) for **a**, Borno and **b**, Kaduna.

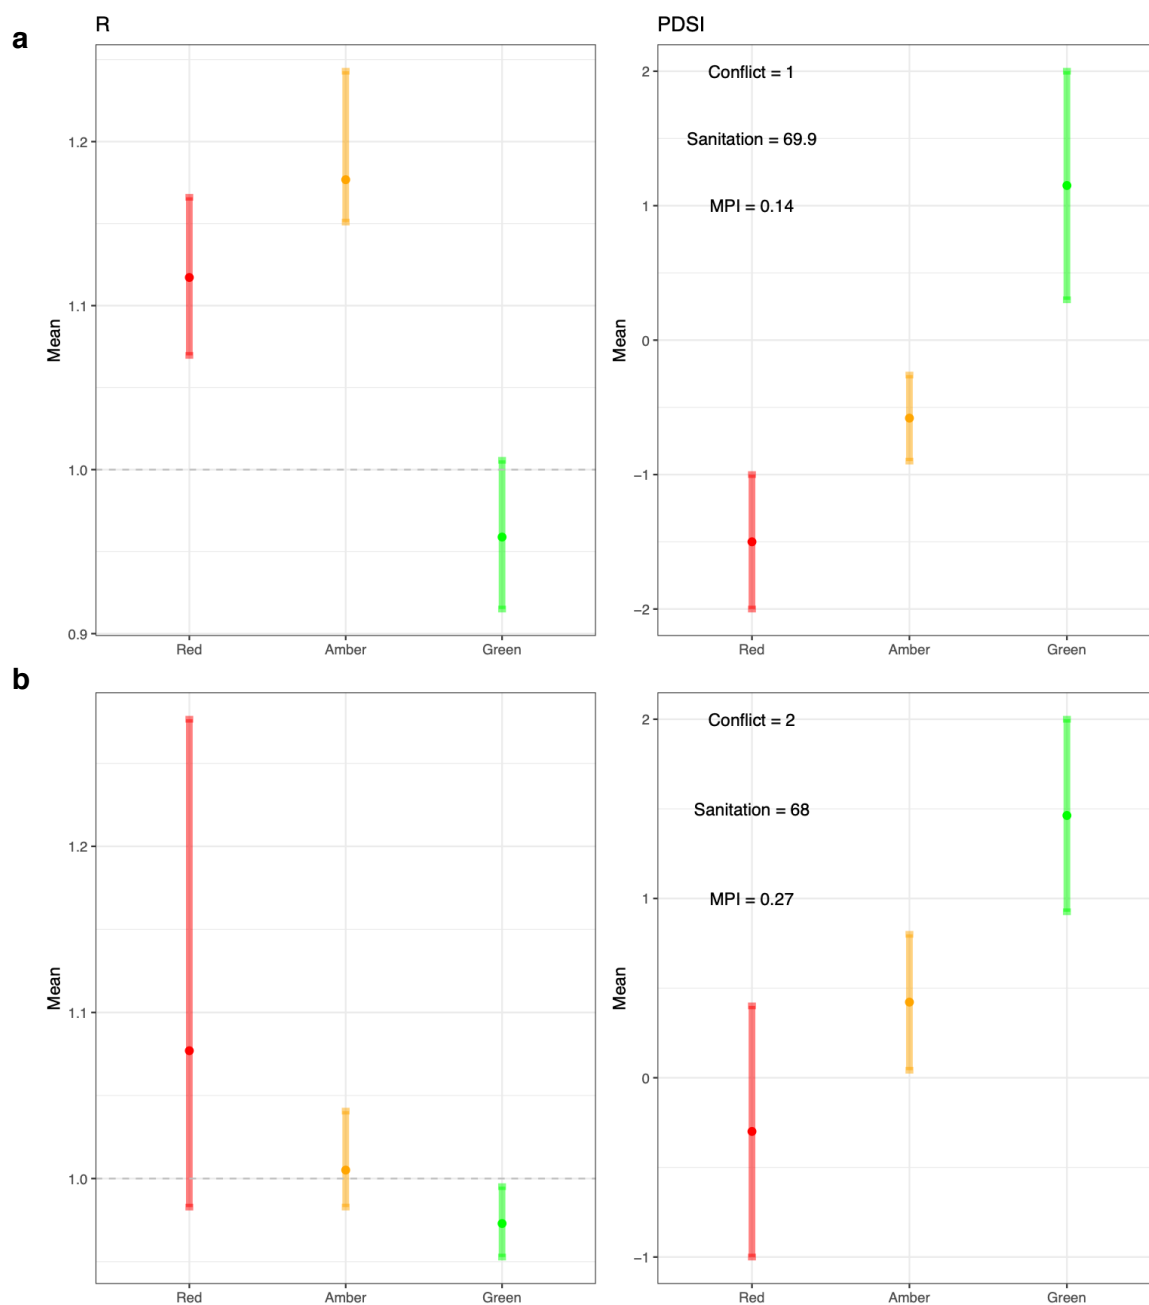

**Supplementary Figure 3: Three traffic-light scenarios for PDSI (drier conditions) only and the corresponding predicted R values.** The other three (Conflict, Sanitation and MPI) covariate values were retained at the mean value for  $R > 1$  for the full dataset (values shown in the plot) for **a**, Kwara and **b**, Nasarawa.

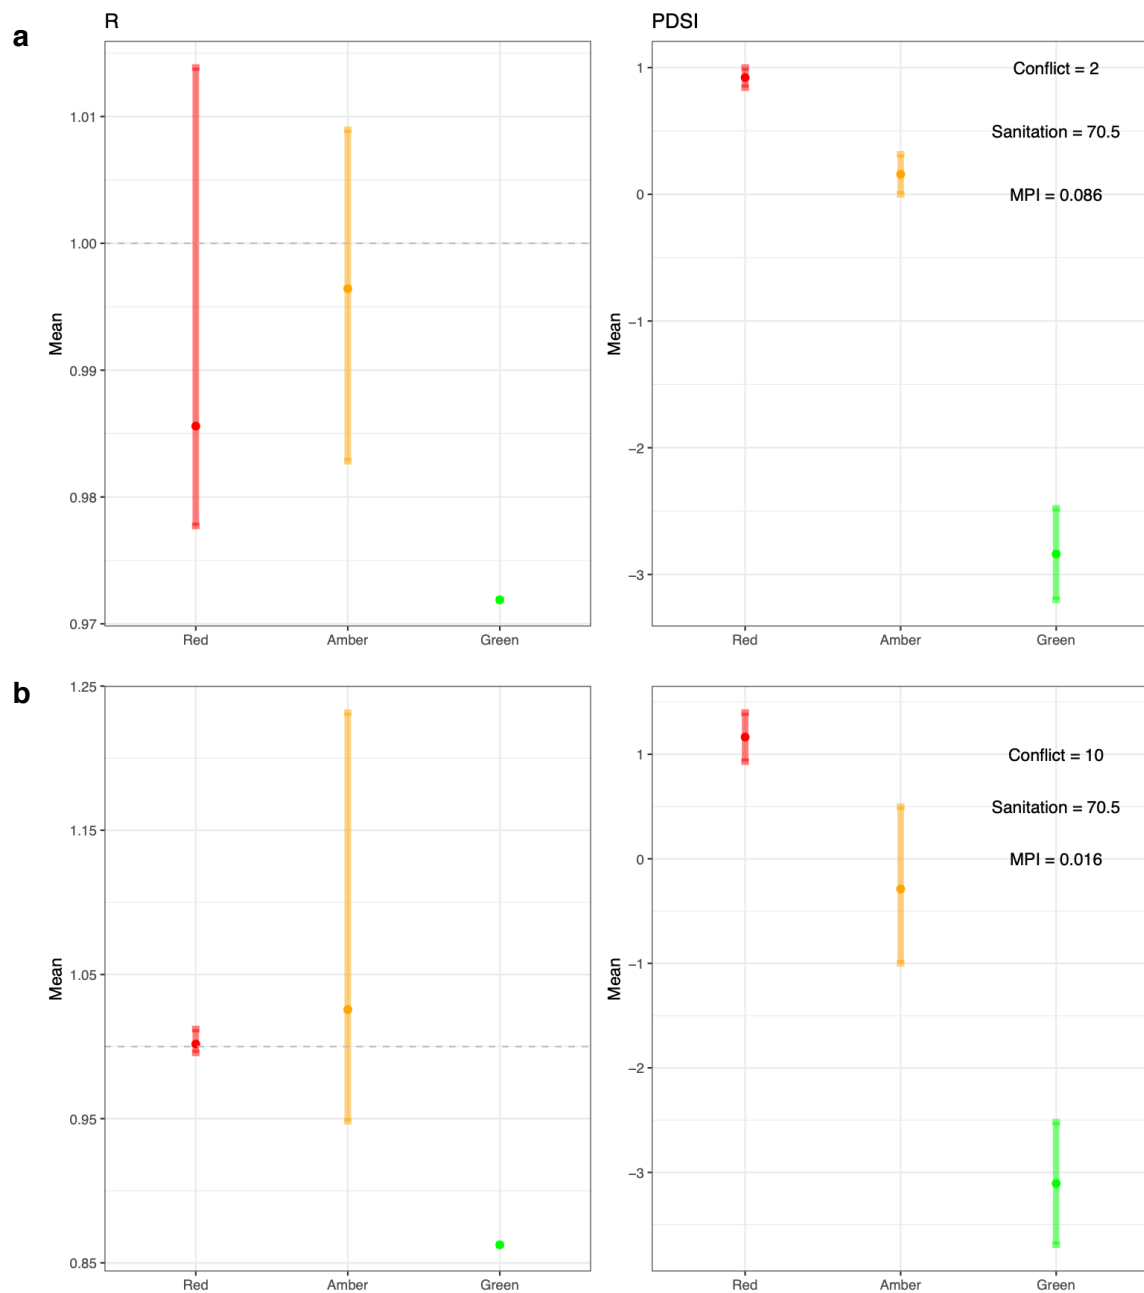

**Supplementary Figure 4: Three traffic-light scenarios for PDSI (wetter conditions) only and the corresponding predicted R values.** The other three (Conflict, Sanitation and MPI) covariate values were retained at the mean value for  $R > 1$  for the full dataset (values shown in the plot) for **a**, Ekiti and **b**, Lagos.

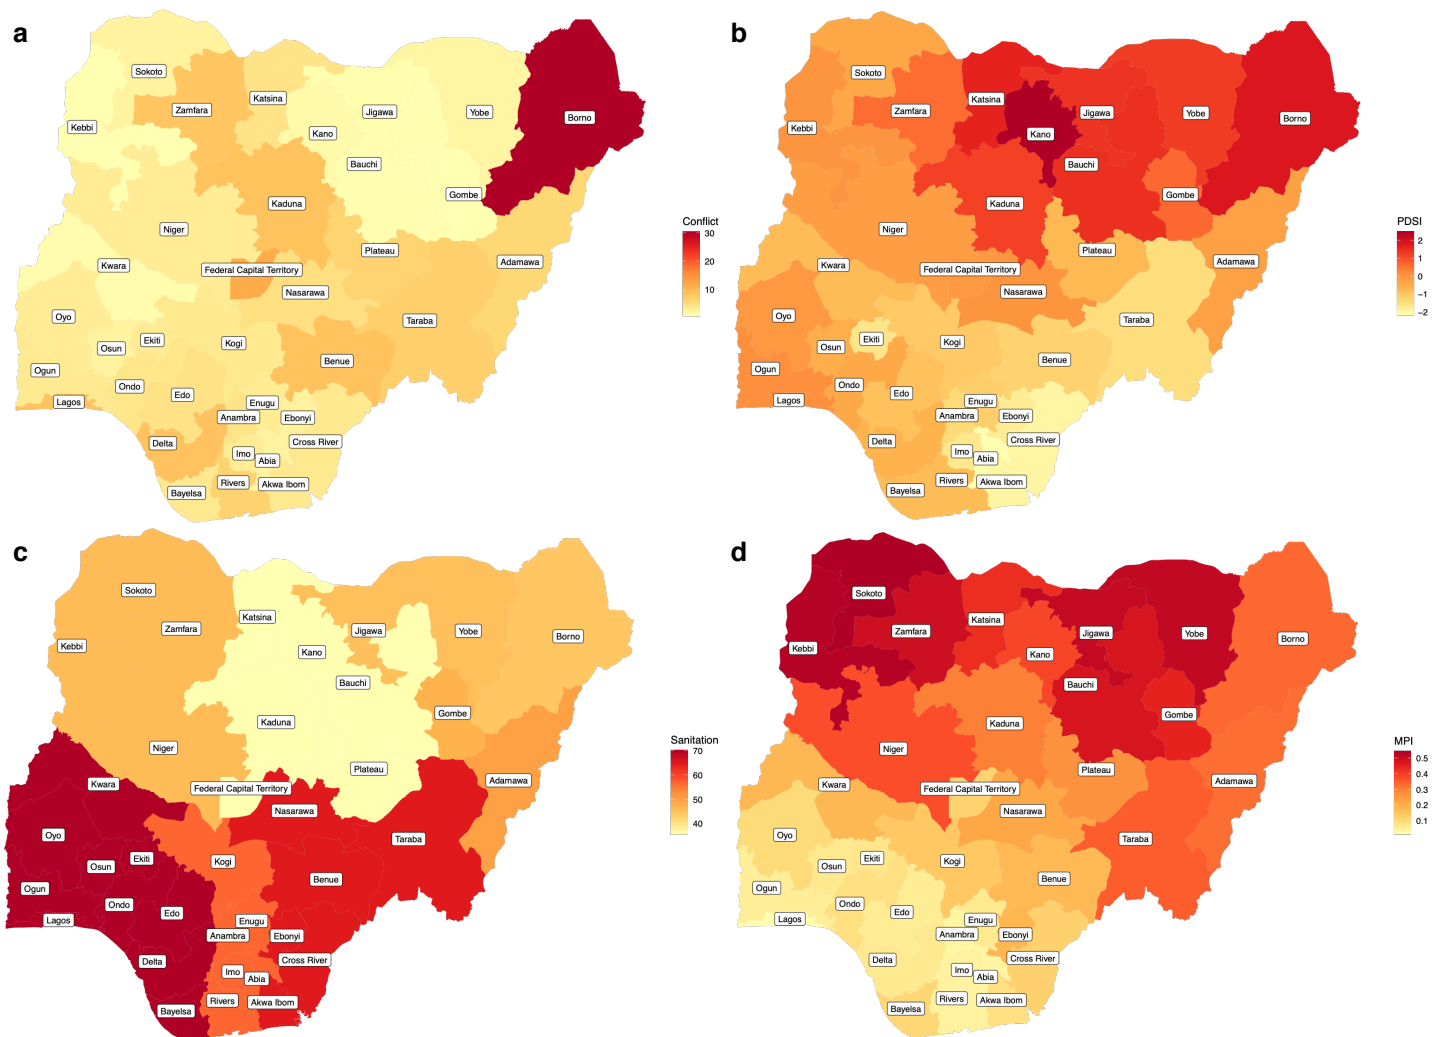

**Supplementary Figure 5: Average values of the four covariates included in the best fit model.** By state, covariates included: **a**, monthly conflict events, **b**, Palmers Drought Severity Index (PDSI), **c**, percentage access to sanitation and **d**, Multidimensional Poverty Index (MPI).



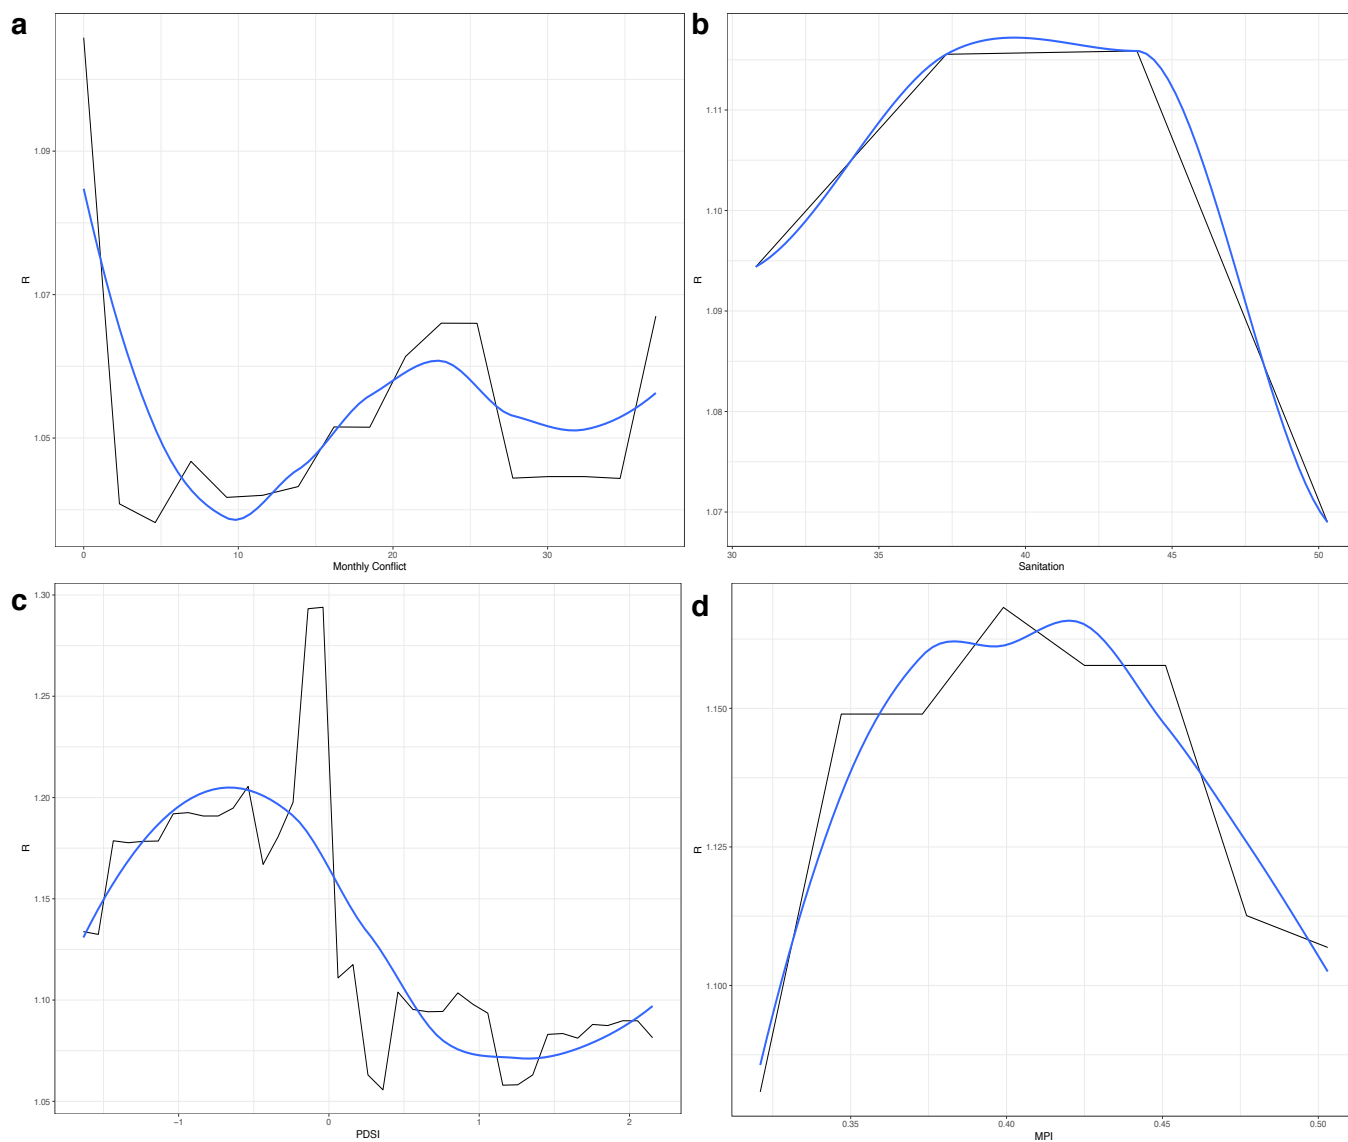

**Supplementary Figure 6: Single predictor partial dependency plots for the covariates in the best fit model.** Showing the relationships between **a**, monthly conflict events, **b**, access to sanitation, **c**, Palmers Drought Severity Index (PDSI) and **d**, Multidimensional poverty Index (MPI) and R.

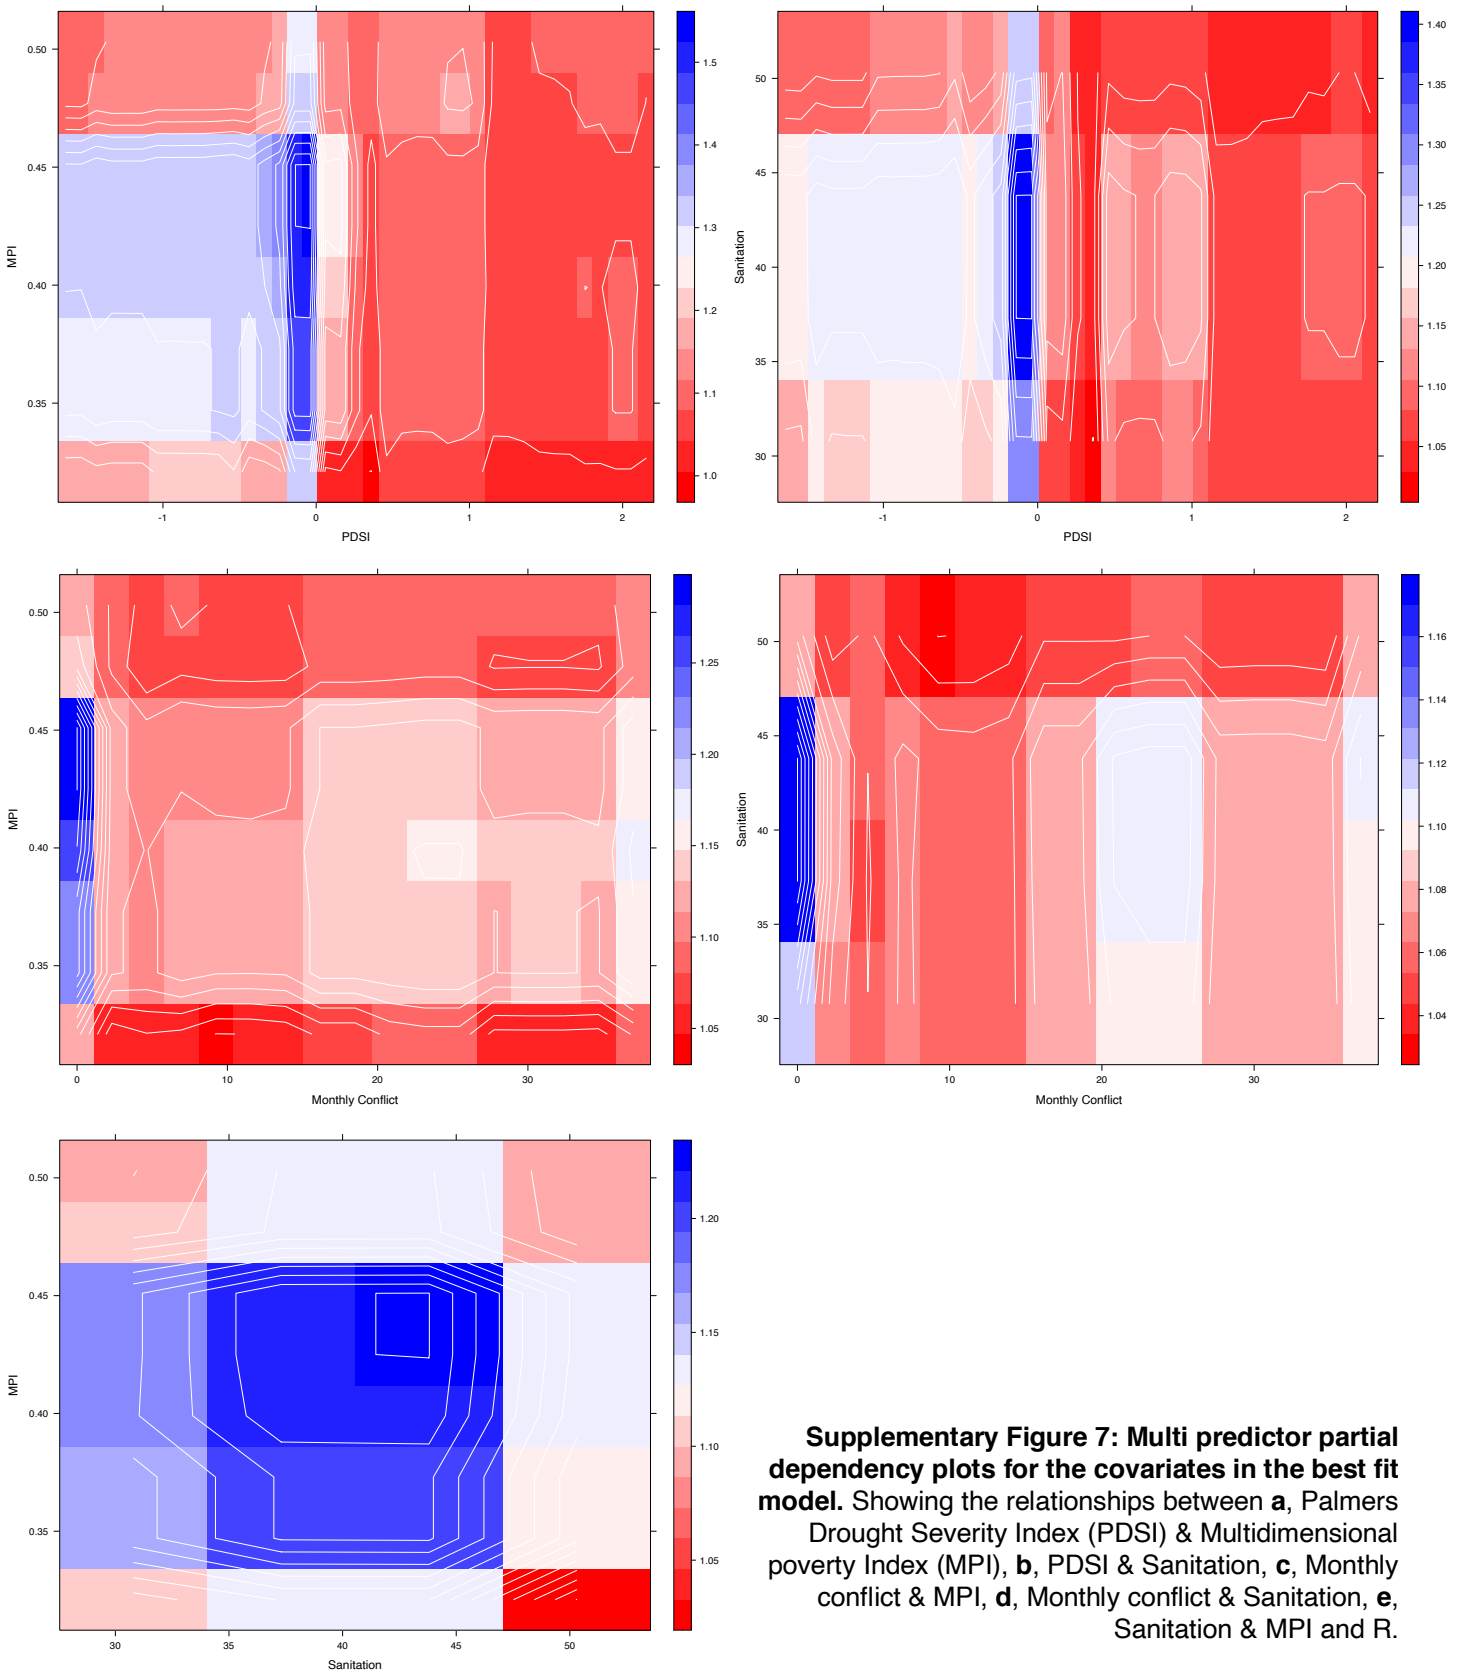

**Supplementary Figure 7: Multi predictor partial dependency plots for the covariates in the best fit model.** Showing the relationships between **a**, Palmers Drought Severity Index (PDSI) & Multidimensional poverty Index (MPI), **b**, PDSI & Sanitation, **c**, Monthly conflict & MPI, **d**, Monthly conflict & Sanitation, **e**, Sanitation & MPI and R.

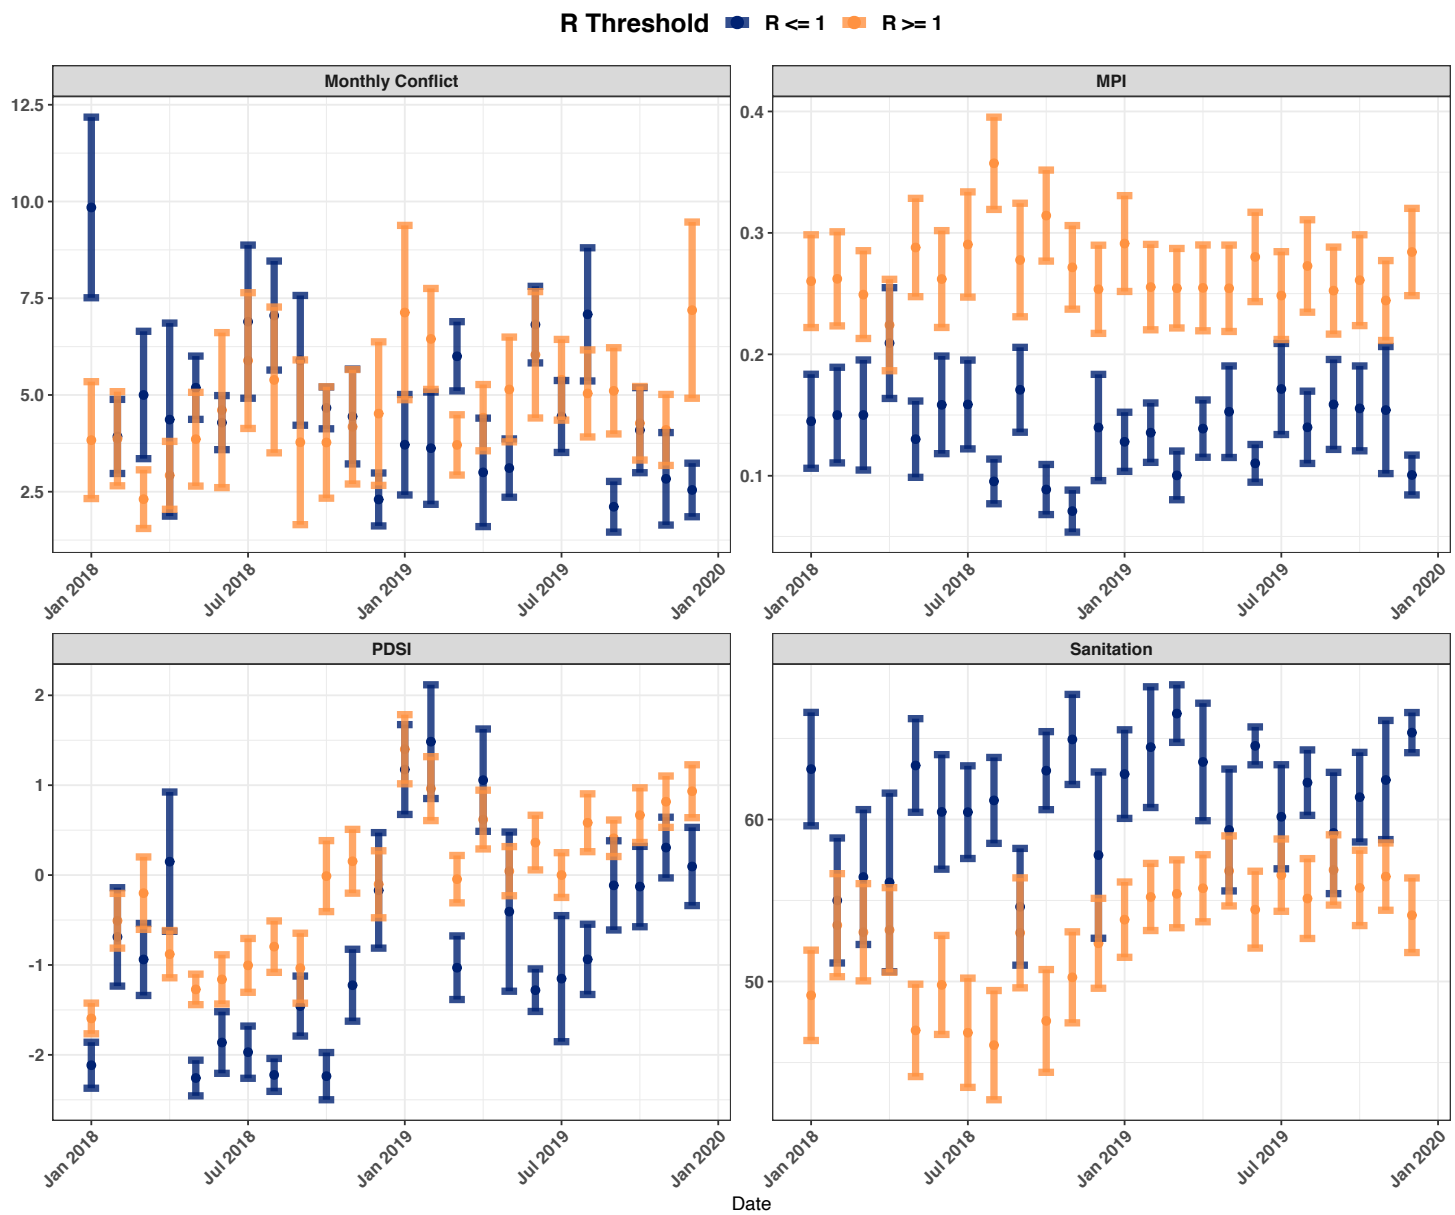

**Supplementary Figure 8: Historical temporal trends between the best fit model covariates and the R thresholds ( $R \geq 1$ ,  $R < 1$ ).** The mean and standard error for the four covariates included in the best fit model for the full dataset split by month and R threshold.
